# Supplementary material for: FBXW7-mediated stability regulation of signal transducer and activator of transcription 2 in melanoma formation
Source: PubMed Central journal article supplement — Proc Natl Acad Sci U S A. 2019 Dec 16;117(1):584–94. doi: 10.1073/pnas.1909879116 (PMC6955312; doi:10.1073/pnas.1909879116), 2019-12-16

[SI Appendix]

**FBXW7-mediated stability regulation of signal transducer and activator of transcription 2 in melanoma formation**

Cheol-Jung Lee<sup>1</sup>, Hyun-Jung An<sup>1</sup>, Seung-Min Kim<sup>1</sup>, Sun-Mi Yoo<sup>1</sup>, Juhee Park<sup>1</sup>, Ga-Eun Lee<sup>1</sup>, Woo-Young Kim<sup>2</sup>, Dae Joon Kim<sup>3</sup>, Han Chang Kang<sup>1</sup>, Joo Young Lee<sup>1</sup>, Hye Suk Lee<sup>1</sup>, Sung-Jun Cho<sup>4</sup>, and Yong-Yeon Cho<sup>1,\*</sup>

Content

- 1. *SI Appendix*, Supplementary Materials and Methods**
- 2. *SI Appendix*, References**
- 3. *SI Appendix*, 8 Tables**
- 4. *SI Appendix*, 9 Figures**
- 5. *SI Appendix*, Whole blots**

## **1. SI Appendix, Supplementary Materials and Methods**

### **Cell culture and transfection**

293T, HeLa, U2OS, HaCaT, and HCT116 were cultured in Dulbeccos's Modified Eagle's Media (DMEM, ThermoFisher Scientific) supplemented with 10% fetal bovine serum (FBS), 2 mM glutamine (ThermoFisher Scientific), 100 U penicillin, and 100 µg/mL streptomycin (ThermoFisher Scientific). SK-MEL-2, -5, and -28 cells were cultured in Minimal Essential Media (MEM) supplemented with 10% fetal bovine serum (FBS), 2 mM glutamine (ThermoFisher Scientific), 100 U penicillin, and 100 µg/mL streptomycin (ThermoFisher Scientific). The *FBXW7*<sup>+/+</sup> and *FBXW7*<sup>-/-</sup> of HCT116 cells were kind gifts from Dr. Bert Vogelstein (Rajagopalan et al., 2004). The cells were maintained at 37°C in a 5% CO<sub>2</sub> incubator. When the cells reached 50% confluence, the plasmids were transfected using jetPEI (Polyplus, New York, NY) following the manufacturer's protocol. At 30 h post-transfection, transfected cells were subjected to Western blotting or immunoprecipitation.

### **Mammalian two-hybrid assay.**

293T cells (2.0 X 10<sup>4</sup>) were seeded into 48-well plates and transfected with pBIND-FBXW7 as the bait, the indicated pACT-transcription factors as the prey, and pG5-luciferase reporter plasmids. Thirty hours after transfection, the cells were disrupted with cell lysis buffer and incubated on an orbital shaker for 30 min. The lysate (20 µl - 40 µl) was transfer to 96-well white luminescence plate, and the luminescence activity was measured automatically with Victor X3 plate reader (PerkinElmer). The relative luciferase activity was calculated and normalized based on the pBIND-FBXW7/pACT-mock/pG5-luciferase basal control. We measured the transfection efficiency and protein concentration via a luciferase assay, Renilla luciferase activity assay, or Lowry protein assay were used.

### ***In vitro* kinase assay**

*In vitro* kinase assay was performed as described previously (1). Briefly, the GST fusion STAT2 proteins (2 µg) including GST-STAT4-WT or -4A was combined with commercially active glycogen synthase kinase 3 $\alpha$  (GSK3 $\alpha$ ) or GSK3 $\beta$  purchased from SignalChem in the presence of 100 µM ATP, 10 µCi [ $\gamma$ - $^{32}$ P]ATPm, and kinase reaction buffer. The reaction mixture was incubated at 30 °C for 30 min, and the reaction was stopped by adding 6X SDS sample buffer and boiling at 95 °C for 3 min. The  $^{32}$ P-labeled GST-STAT2 proteins were visualized by autoradiography.

### **RNA isolation**

Total RNA was isolated using Trizol reagent (Invitrogen). The RNA quality was assessed with an Agilent 2100 bioanalyzer using the RNA 6000 Nano Chip (Agilent Technologies, Amstelveen, The Netherlands), and RNA quantification used a ND-2000 Spectrophotometer (Thermo Inc., DE, USA).

### **GST-STAT2 purification**

The pGEX-5x-1-STAT2 plasmid with N-terminal glutathione S-transferase (GST) tag was introduced into Rosetta BL21 competent cells (Merck Millipore Korea, Seoul, Korea). The recombinant GST-STAT2 protein was induced by 0.1 mM of isopropyl  $\beta$ -D-1-thiogalactopyranoside (IPTG) induction for 16 h at 16 °C. The bacterial cell pellets were obtained by centrifugation at 4,000 rpm for 15 min, sonicated in cell lysis buffer, and the supernatant (soluble fraction) was incubated with 50% glutathione-sepharose slurry (GE healthcare Lifescience, Seoul Korea) for 2 h at 4 °C. The beads were washed with PBS buffer and eluted with elution buffer. The eluted GST-STAT2 proteins were used for *in vitro* kinase assays.

### **Generation of stable cell lines using viral infection**

293T cells were used for packaging of lentiviral or retroviral cDNA-expressing viruses to produce viral particles. The viral particles were then used to infect various cell lines. In brief, media containing secreted viruses were collected twice at 24 h and 48 h after transfection, and then filtered with 0.45 µm acetate

syringe filters. Various cell lines were infected with the viruses in the presence of 1 µg/ml polybrene (Sigma Aldrich) and cultured for 48 h. Cells were selected using puromycin (5 µg/ml) or hygromycin B (200 µg/ml) for three days.

### **Western blot and Immunoprecipitation**

Cells were disrupted with lysis buffer (50 mM Tris at pH 8.0, 150 mM NaCl and 0.5% NP-40) and supplemented with protein inhibitor cocktail (Complete Mini, Roche). The cell lysate protein mixtures were measured with spectrophotometer (xMark, BioRad) using the Bio-Rad *DC* Protein Assay kit. Samples containing equal amounts of whole cell lysates were resolved by SDS-PAGE and immunoblotted with indicated antibodies. For immunoprecipitation, 500 µg of lysates were incubated with the 2 µg of indicated antibodies for 4 h or overnight at 4°C followed by 2 h incubation with protein G sepharose beads (GE Healthcare). The immunoprecipitates were washed three times with wash buffer (20 mM Tris at pH 8.0, 100 mM NaCl, 1 mM EDTA, and 0.5% NP-40) resolved by SDS-PAGE and immunoblotted with the indicated antibodies.

### **Cell proliferation assay**

Cell proliferation was measured by MTS (Promega). SK-MEL-2, -5, and 28 cells ( $2 \times 10^3$ /well) were seeded into 96-well plates with 100 µl of culture medium. At each time point, each well was treated with 20 µl of CellTiter 96 Aqueous One Solution. The mixture was incubated for 1 h at 37°C in a 5% CO<sub>2</sub> incubator and then the absorbance at 492 nm was measured using an xMark™ Microplate Absorbance Spectrophotometer (Bio-Rad Laboratories).

### **Quantitative real-time PCR**

HCT116<sup>FBXW7+/+</sup> and HCT116<sup>FBXW7-/-</sup> ( $5 \times 10^5$ ) cells were seeded into a 60-mm dish and cultured overnight. The cells were harvested, and total RNA was extracted by Trizol Reagent (Thermo Fisher Scientific). The

RNA concentration and quality were measured by NanoVue (GE Healthcare Life Sciences), and STAT2 gene expression was analyzed with 50 ng of total RNA using STAT-2 specific real-time primer set (Hs00237139\_m1) and glyceraldehyde 3-phosphate dehydrogenase (GAPDH)-specific real-time primer set (Hs02786624\_g1). Quantitative real-time PCR was performed by TaqMan RNA-to-Ct™ 1-step kit (Applied Biosystems) following the manufacturer's instructions. The Ct values of STAT2 were normalized with GAPDH as an internal control.

### **UVB irradiation**

Cells were seeded to 80-85% confluence and cultured overnight. The cells were washed with PBS and irradiated with UVB at indicated doses using UV chambers (Opsytec Dr. Grobel GmbH, UV-Elektronik, BS-04). Prewarmed medium was added to cells immediately after UVB irradiation and incubated an additional time before harvest.

### **Soft agar colony formation assay**

Soft agar colony formation was performed with SK-MEL-2, -5, and -28, human melanoma cell lines. Briefly, the cells ( $8 \times 10^3$ /well) were suspended in 1 ml of 0.3% DMEM agar containing 10% FBS. The cultures were maintained at 37 °C in a 5% CO<sub>2</sub> incubator for 2-3 weeks. The colonies were counted using an ECLIPSE Ti inverted microscope and analyzed by NIS-Elements AR (V. 4.0) computer software program (NIKON Instruments Korea, Seoul, Korea).

### **Skin cancer tissue array (Immunohistofluorescence assay)**

Immunohistofluorescence assay was performed as described previously (C.J. Lee, CDD. 2018). A human skin tissue array (SK801) was purchased from US Biomax. Briefly, the slide was deparaffinized by incubation at 60 °C for 2 h, rehydrated, and unmasked by boiling with 10 mM sodium citrate buffer (pH 6.0) for 10 min. After cooling, the slide was blocked with 5% goat serum in 0.5% Triton X-100/PBS for 1 h at

RT and hybridized with the indicated antibodies against STAT2 (100:1) and FBXW7 (100:1) overnight at 4°C. The slide was washed three times and hybridized with secondary antibodies conjugating Alexa-488 and -568 for 2 h at RT. Images were captured using laser scanning confocal microscope (LSM 710), and the intensity was analyzed by Image J computer software program (Ver. 1.6).

### **STAT2 and FBXW7 docking**

Computational STAT2 and FBXW7 docking used a Discovery Studio Ver. 2018 computer program. The crystal structure of FBXW7 (PDB ID: 2VOP) was obtained from human protein database (<https://www.rcsb.org/>). The STAT2 protein structure was built by SWISS-MODEL homology modeling (<https://swissmodel.expasy.org/>) based on the STAT1/DNA complex structure that contained 44.6% amino acid similarity with STAT2 (ID: 1YVL, (2)). The complex structural model of the STAT2-FBXW7 interaction was developed using *in silico* antigen-antibody docking. A rigid-body docking program, ZDOCK (3), with default parameters was used to search all possible binding modes for the antibody and antigen to obtain more accurate predictions for the two proteins by evaluating shape complementarity and desolvation energy. The leading 2,000 predictions from ZDOCK were fed into RDOCK where they were minimized by CHARMM to improve the energy levels and eliminate clashes. The desolvation energy and electrostatics were then recomputed by RDOCK. To further obtain a reliable complex structure in the solvated system, the best prediction from RDOCK was simulated with water molecules and optional counterions to simulate the solvent and minimize and calculate the solvation model in Discovery Studio v 2018. The solvated system can be optionally minimized to eliminate van Der Waals clashes. Finally, the interaction between the WD40 domain of FBXW7 and the degron motifs of the DNA binding domain found in STAT2 was successfully emulated using the complementarity-determining regions (CDRs) of the rational antibody-antigen complex model. The rational antibody-antigen complex model satisfied the complementarity-determining regions (CDRs) of the WD40 domain of FBXW7 interacting with the degron motifs of the STAT2 at the DNA binding domain. STAT2 was compared to STAT1 to identify structural

similarities (1YVL). Acceptable poses of FBXW7 for STAT2 binding at WD40 domains were compared with FBXW7 and cycle E docking (4).

### **Ampli-Seq Method (Human)**

AmpliSeq libraries were constructed and sequenced on the Ion Torrent S5xl platform (Thermo Fisher) according to the manufacturer's instructions. For human gene analysis in cell lines, the Ion AmpliSeq Transcriptome Human Gene Expression Kit is designed for targeted amplification of over 20,000 human RefSeq genes simultaneously in a single primer pool. A short amplicon (~ 110 base pairs (bp)) was amplified for the targeted gene. For each sample, 30 ng of total RNA was used for cDNA library preparation. Multiple libraries were multiplexed and clonally amplified using the Ion Chef System (Thermo Fisher) and then sequenced on an Ion Torrent S5xl machine (Thermo Fisher). The values were normalized using ampliSeq RNA Plug in (ver 5.6.0.3) by Torrent Suite Software (Thermo Fisher).

## **2. SI Appendix, References**

1. Lee CJ, *et al.* (2014) Targeting of magnolin on ERKs inhibits Ras/ERKs/RSK2-signaling-mediated neoplastic cell transformation. *Carcinogenesis* 35(2):432-441.
2. Mao X, *et al.* (2005) Structural bases of unphosphorylated STAT1 association and receptor binding. *Mol Cell* 17(6):761-771.
3. Chen R, Li L, & Weng Z (2003) ZDOCK: an initial-stage protein-docking algorithm. *Proteins* 52(1):80-87.
4. Hao B, Oehlmann S, Sowa ME, Harper JW, & Pavletich NP (2007) Structure of a Fbw7-Skp1-cyclin E complex: multisite-phosphorylated substrate recognition by SCF ubiquitin ligases. *Mol Cell* 26(1):131-143.



### 3. SI Appendix, Tables

**SI Appendix, Table S1.** Antibodies use in this research.

| <b>antibodies</b>                            | <b>Source</b>             | <b>Identifier</b>                |
|----------------------------------------------|---------------------------|----------------------------------|
| Rabbit polyclonal anti-STAT1                 | Cell Signaling Technology | Cat# 9172; PRID:AB_2198300       |
| Rabbit monoclonal anti-K48-linkage Ubiquitin | Cell Signaling Technology | Cat# 5621; PRID:AB_10827985      |
| Rabbit monoclonal anti-K63-linkage Ubiquitin | Cell Signaling Technology | Cat# 8081; PRID:AB_10859893      |
| Mouse monoclonal anti-GSK3b                  | Cell Signaling Technology | Cat# 9832; PRID:AB_10839406      |
| Mouse monoclonal anti-p-SAPK/JNK (T183/Y180) | Cell Signaling Technology | Cat# 9255; PRID:AB_2307321       |
| Mouse monoclonal anti-vp16                   | Santa Cruz Biotechnology  | Cat# sc-7546; PRID:AB_628444     |
| Mouse monoclonal anti-Myc                    | Santa Cruz Biotechnology  | Cat# sc-40; PRID:AB_627268       |
| Rabbit polyclonal anti-Gal4                  | Santa Cruz Biotechnology  | Cat# sc-577; PRID:AB_631554      |
| Mouse monoclonal anti-GST                    | Santa Cruz Biotechnology  | Cat# sc-138; PRID:AB_627677      |
| Mouse monoclonal anti-STAT3                  | Santa Cruz Biotechnology  | Cat# sc-8019; PRID:AB_628293     |
| Mouse monoclonal anti-STAT2                  | Santa Cruz Biotechnology  | Cat# sc-1668; PRID:AB_628291     |
| Mouse monoclonal anti-cyclin E               | Santa Cruz Biotechnology  | Cat# sc-247; PRID:AB_627357      |
| Mouse monoclonal anti-b-actin                | Santa Cruz Biotechnology  | Cat# sc-47778; PRID:AB_626632    |
| Mouse monoclonal anti-cullin1                | Santa Cruz Biotechnology  | Cat# sc-17775; PRID:AB_627325    |
| Mouse monoclonal anti-c-Myc                  | Santa Cruz Biotechnology  | Cat# sc-373712; PRID:AB_10916994 |
| Mouse monoclonal anti-Flag                   | Sigma-Aldrich             | Cat# F1804; RRID: AB_262044      |
| Mouse monoclonal anti-HA agarose beads       | Sigma-Aldrich             | Cat# A-2095; RRID: AB_257974     |
| Mouse monoclonal anti-HisG-HRP               | Thermo Fisher Scientific  | Cat# R941-25 RRID: AB_2556558    |
| Mouse monoclonal anti-Xpress                 | Thermo Fisher Scientific  | Cat# R910-25 RRID: AB_2556552    |
| Rabbit polyclonal anti-FBXW7                 | Bethyl Laboratories       | Cat# A301-720A; RRID: AB_1210897 |
| Mouse monoclonal anti-HA-HRP                 | MBL International         | Cat# M180-7; RRID: AB_11124961   |

**SI Appendix, Table S2.** Chemicals and proteins utilized in this research.

| <b>Chemicals, Recombinant proteins</b> | <b>Source</b>       | <b>Identifier</b> |
|----------------------------------------|---------------------|-------------------|
| MLN4924                                | Calbiochem          | Cat# 505477       |
| MG132                                  | Sigma-Aldrich       | Cat# C2211        |
| cycloheximide                          | Sigma-Aldrich       | Cat# 01810        |
| Alkaline phosphatase                   | New England BioLabs | Cat# M0290S       |
| CHIR99021 (GSK3 inhibitor)             | Selleckchem         | Cat# S1263        |
| GSK3a, Active                          | Signalchem          | Cat# G08-10G      |
| GSK3b, Active                          | Signalchem          | Cat# G09-10G      |

**SI Appendix, Table S3.** Assay kits utilized in this research.

| <b>Critical commercial Assays</b>   | <b>Source</b> | <b>Identifier</b> |
|-------------------------------------|---------------|-------------------|
| Site-specific Mutagenesis Kit       | ELPIS-BIOTECH | Cat# EBT-5001     |
| Quick Start Bradford 1x Dye Reagent | BIO-RAD       | Cat# 500-0205     |

**SI Appendix, Table S4.** List for Information of bacterial strains utilized in this article.

| <b>Bacterial Strains</b> | <b>Source</b> | <b>Identifier</b> |
|--------------------------|---------------|-------------------|
| DH5a                     | enzynomics    |                   |
| BL21                     | enzynomics    |                   |

**SI Appendix, Table S5.** Mammalian cell lines used in this research.

| <b>Experimental Models: Cell Lines</b>               | <b>Source</b>            | <b>Identifier</b> |
|------------------------------------------------------|--------------------------|-------------------|
| 293T                                                 | ATCC                     |                   |
| Hela                                                 | ATCC                     |                   |
| U2OS                                                 | ATCC                     |                   |
| HCT116 FBXW7 <sup>+/+</sup> and FBXW7 <sup>-/-</sup> | Rajagopalan et al., 2004 |                   |
| WM2664                                               | Korean Cell Line Bank    |                   |
| A375-SM                                              | Korean Cell Line Bank    |                   |
| HS294T                                               | Korean Cell Line Bank    |                   |

|           |      |  |
|-----------|------|--|
| SK-MEL-2  | ATCC |  |
| SK-MEL-5  | ATCC |  |
| SK-MEL-28 | ATCC |  |
| HaCaT     | ATCC |  |

*SI Appendix, Table S6.* Plasmids utilized in this research.

| <b>Recombinant DNA</b>     | <b>Source</b>         | <b>Identifier</b> |
|----------------------------|-----------------------|-------------------|
| shRNA FBW7-1               | Dharmacon             | TRCN0000006556    |
| shRNA FBW7-2               | Dharmacon             | TRCN0000006558    |
| shRNA Cullin1-1            | Dharmacon             | TRCN0000003391    |
| shRNA Cullin1-2            | Dharmacon             | TRCN0000003392    |
| shRNA STAT2                | Dharmacon             | TRCN0000007460    |
| plasmid Myc-Cullin1        | Addgene               | #19896            |
| plasmid Myc-Cullin2        | Addgene               | #19892            |
| plasmid Myc-Cullin3        | Addgene               | #19893            |
| plasmid Myc-Cullin4A       | Addgene               | #19951            |
| plasmid Myc-Cullin4B       | Addgene               | #19922            |
| plasmid Myc-Cullin7        | Addgene               | #20695            |
| plasmid Myc-RBX1           | Addgene               | #20717            |
| plasmid Flag-bTrcp1        | Dr. Michele Pagano    |                   |
| plasmid Flag-FBXW2         | Dr. Michele Pagano    |                   |
| plasmid Flag-FBXW7         | Dr. Michele Pagano    |                   |
| plasmid Gal4-FBXL1         | Korea Human Gene Bank | hMU008256         |
| plasmid Gal4-FBXL8         | Korea Human Gene Bank | hMU011707         |
| plasmid Gal4-FBXL9         | Korea Human Gene Bank | hMU013084         |
| plasmid Gal4-FBXO4         | Korea Human Gene Bank | KU026612          |
| plasmid Gal4-FBXO6         | Korea Human Gene Bank | hMU013630         |
| plasmid Gal4-FBXO17        | Korea Human Gene Bank | hMU001519         |
| plasmid Xp/His-STAT2       | This paper            | N/A               |
| plasmid Xp/His-STAT2 1-698 | This paper            | N/A               |
| plasmid Xp/His-STAT2 1-574 | This paper            | N/A               |
| plasmid Xp/His-STAT2 1-315 | This paper            | N/A               |
| plasmid Xp/His-STAT2 1-139 | This paper            | N/A               |

|                                                      |                       |        |
|------------------------------------------------------|-----------------------|--------|
| plasmid Xp/His-STAT2 Δ140                            | This paper            | N/A    |
| plasmid Xp/His-STAT2 Δ316                            | This paper            | N/A    |
| plasmid Xp/His-STAT2 Δ575                            | This paper            | N/A    |
| plasmid Xp/His-STAT2 Δ699                            | This paper            | N/A    |
| plasmid Xp/His-STAT2 N                               | This paper            | N/A    |
| plasmid Xp/His-STAT2 C-C                             | This paper            | N/A    |
| plasmid Xp/His-STAT2 DNA                             | This paper            | N/A    |
| plasmid Xp/His-STAT2 SH2                             | This paper            | N/A    |
| plasmid Xp/His-STAT2 T                               | This paper            | N/A    |
| plasmid Xp/His-STAT2 ΔC-C                            | This paper            | N/A    |
| plasmid Xp/His-STAT2 ΔDNA                            | This paper            | N/A    |
| plasmid Xp/His-STAT2 ΔC-C/DNA                        | This paper            | N/A    |
| plasmid Xp/His-STAT2 3A<br>(S381A/T385A/E389A)       | This paper            | N/A    |
| plasmid Xp/His-STAT2 4A<br>(S381A/T385A/E389A/S393A) | This paper            | N/A    |
| plasmid myc-FBXW7 N278                               | This paper            | N/A    |
| plasmid myc-FBXW7 N324                               | This paper            | N/A    |
| plasmid myc-FBXW7 C325                               | This paper            | N/A    |
| HA-GSK3b                                             | Addgene               | #14753 |
| HA-CK1                                               | Korea Human Gene Bank | N/A    |
| His-ERK                                              | Korea Human Gene Bank | N/A    |
| Gal4-p38                                             | Korea Human Gene Bank | N/A    |

**SI Appendix, Table S7.** Details on the tissue array samples.

| position | sex | age | organ | pathology                              | grade | image                                                                                                                                                               | type      | FBXW7(red intensity) | STAT2 (Green intensity) |
|----------|-----|-----|-------|----------------------------------------|-------|---------------------------------------------------------------------------------------------------------------------------------------------------------------------|-----------|----------------------|-------------------------|
| A1       | M   | 45  | Skin  | Squamous carcinoma cell                | II    | <a href="http://www.biomax.us/tissue-array-image.php?catalognum=SK801&amp;number=1">http://www.biomax.us/tissue-array-image.php?catalognum=SK801&amp;number=1</a>   | Malignant | 12.0                 | 43.0                    |
| A2       | M   | 47  | Skin  | Squamous carcinoma cell                | II    | <a href="http://www.biomax.us/tissue-array-image.php?catalognum=SK801&amp;number=2">http://www.biomax.us/tissue-array-image.php?catalognum=SK801&amp;number=2</a>   | Malignant | 11.5                 | 24.6                    |
| A3       | M   | 66  | Skin  | Squamous carcinoma cell                | I     | <a href="http://www.biomax.us/tissue-array-image.php?catalognum=SK801&amp;number=3">http://www.biomax.us/tissue-array-image.php?catalognum=SK801&amp;number=3</a>   | Malignant | 6.1                  | 34.3                    |
| A4       | M   | 71  | Skin  | Chronic inflammation of fibrous tissue | -     | <a href="http://www.biomax.us/tissue-array-image.php?catalognum=SK801&amp;number=4">http://www.biomax.us/tissue-array-image.php?catalognum=SK801&amp;number=4</a>   | Malignant | 8.2                  | 24.8                    |
| A5       | M   | 52  | Skin  | Malignant melanoma                     | -     | <a href="http://www.biomax.us/tissue-array-image.php?catalognum=SK801&amp;number=5">http://www.biomax.us/tissue-array-image.php?catalognum=SK801&amp;number=5</a>   | Malignant | 11.5                 | 18.3                    |
| A6       | F   | 75  | Skin  | Malignant melanoma                     | -     | <a href="http://www.biomax.us/tissue-array-image.php?catalognum=SK801&amp;number=6">http://www.biomax.us/tissue-array-image.php?catalognum=SK801&amp;number=6</a>   | Malignant | 14.2                 | 53.3                    |
| A7       | M   | 53  | Skin  | Malignant melanoma                     | -     | <a href="http://www.biomax.us/tissue-array-image.php?catalognum=SK801&amp;number=7">http://www.biomax.us/tissue-array-image.php?catalognum=SK801&amp;number=7</a>   | Malignant | 9.9                  | 25.9                    |
| A8       | M   | 70  | Skin  | Squamous carcinoma cell                | I     | <a href="http://www.biomax.us/tissue-array-image.php?catalognum=SK801&amp;number=8">http://www.biomax.us/tissue-array-image.php?catalognum=SK801&amp;number=8</a>   | Malignant | 8.4                  | 19.4                    |
| A9       | F   | 80  | Skin  | Squamous carcinoma cell                | I     | <a href="http://www.biomax.us/tissue-array-image.php?catalognum=SK801&amp;number=9">http://www.biomax.us/tissue-array-image.php?catalognum=SK801&amp;number=9</a>   | Malignant | 10.2                 | 38.4                    |
| A10      | M   | 37  | Skin  | Squamous carcinoma cell                | I     | <a href="http://www.biomax.us/tissue-array-image.php?catalognum=SK801&amp;number=10">http://www.biomax.us/tissue-array-image.php?catalognum=SK801&amp;number=10</a> | Malignant | 9.3                  | 40.7                    |

|     |   |    |      |                                     |      |     |                                                                                                                                                                             |           |      |      |
|-----|---|----|------|-------------------------------------|------|-----|-----------------------------------------------------------------------------------------------------------------------------------------------------------------------------|-----------|------|------|
|     |   |    |      | carcinoma                           |      |     | <a href="http://www.biomedpub.com/submit/submitImage.php?catalognum=SK801&amp;number=10">image.php?catalognum=SK801&amp;number=10</a>                                       |           |      |      |
| B1  | F | 85 | Skin | Squamous carcinoma                  | cell | I   | <a href="http://www.biomedpub.com/submit/submitImage.php?catalognum=SK801&amp;number=11">http://www.biomedpub.com/submit/submitImage.php?catalognum=SK801&amp;number=11</a> | Malignant | 6.7  | 67.8 |
| B2  | M | 65 | Skin | Squamous carcinoma                  | cell | I   | <a href="http://www.biomedpub.com/submit/submitImage.php?catalognum=SK801&amp;number=12">http://www.biomedpub.com/submit/submitImage.php?catalognum=SK801&amp;number=12</a> | Malignant | 6.6  | 72.3 |
| B3  | M | 62 | Skin | Squamous carcinoma                  | cell | I   | <a href="http://www.biomedpub.com/submit/submitImage.php?catalognum=SK801&amp;number=13">http://www.biomedpub.com/submit/submitImage.php?catalognum=SK801&amp;number=13</a> | Malignant | 5.7  | 70.3 |
| B4  | M | 61 | Skin | Squamous carcinoma                  | cell | I   | <a href="http://www.biomedpub.com/submit/submitImage.php?catalognum=SK801&amp;number=14">http://www.biomedpub.com/submit/submitImage.php?catalognum=SK801&amp;number=14</a> | Malignant | 7.6  | 41.4 |
| B5  | F | 86 | Skin | Chronic inflammation of skin tissue |      | -   | <a href="http://www.biomedpub.com/submit/submitImage.php?catalognum=SK801&amp;number=15">http://www.biomedpub.com/submit/submitImage.php?catalognum=SK801&amp;number=15</a> | Malignant | 8.5  | 35.4 |
| B6  | M | 34 | Skin | Squamous carcinoma                  | cell | I   | <a href="http://www.biomedpub.com/submit/submitImage.php?catalognum=SK801&amp;number=16">http://www.biomedpub.com/submit/submitImage.php?catalognum=SK801&amp;number=16</a> | Malignant | 9.2  | 62.7 |
| B7  | F | 56 | Skin | Squamous carcinoma                  | cell | I   | <a href="http://www.biomedpub.com/submit/submitImage.php?catalognum=SK801&amp;number=17">http://www.biomedpub.com/submit/submitImage.php?catalognum=SK801&amp;number=17</a> | Malignant | 6.4  | 47.6 |
| B8  | F | 79 | Skin | Squamous carcinoma                  | cell | I   | <a href="http://www.biomedpub.com/submit/submitImage.php?catalognum=SK801&amp;number=18">http://www.biomedpub.com/submit/submitImage.php?catalognum=SK801&amp;number=18</a> | Malignant | 9.2  | 33.3 |
| B9  | F | 55 | Skin | Squamous carcinoma                  | cell | I   | <a href="http://www.biomedpub.com/submit/submitImage.php?catalognum=SK801&amp;number=19">http://www.biomedpub.com/submit/submitImage.php?catalognum=SK801&amp;number=19</a> | Malignant | 10.4 | 46.4 |
| B10 | M | 73 | Skin | Squamous carcinoma                  | cell | I   | <a href="http://www.biomedpub.com/submit/submitImage.php?catalognum=SK801&amp;number=20">http://www.biomedpub.com/submit/submitImage.php?catalognum=SK801&amp;number=20</a> | Malignant | 8.3  | 18.3 |
| C1  | M | 61 | Skin | Squamous carcinoma                  | cell | I   | <a href="http://www.biomedpub.com/submit/submitImage.php?catalognum=SK801&amp;number=21">http://www.biomedpub.com/submit/submitImage.php?catalognum=SK801&amp;number=21</a> | Malignant | 13.0 | 68.2 |
| C2  | M | 72 | Skin | Squamous carcinoma                  | cell | II  | <a href="http://www.biomedpub.com/submit/submitImage.php?catalognum=SK801&amp;number=22">http://www.biomedpub.com/submit/submitImage.php?catalognum=SK801&amp;number=22</a> | Malignant | 9.8  | 53.0 |
| C3  | M | 74 | Skin | Squamous carcinoma                  | cell | II  | <a href="http://www.biomedpub.com/submit/submitImage.php?catalognum=SK801&amp;number=23">http://www.biomedpub.com/submit/submitImage.php?catalognum=SK801&amp;number=23</a> | Malignant | 4.4  | 21.6 |
| C4  | M | 59 | Skin | Squamous carcinoma                  | cell | II  | <a href="http://www.biomedpub.com/submit/submitImage.php?catalognum=SK801&amp;number=24">http://www.biomedpub.com/submit/submitImage.php?catalognum=SK801&amp;number=24</a> | Malignant | X    | X    |
| C5  | M | 65 | Skin | Squamous carcinoma                  | cell | II  | <a href="http://www.biomedpub.com/submit/submitImage.php?catalognum=SK801&amp;number=25">http://www.biomedpub.com/submit/submitImage.php?catalognum=SK801&amp;number=25</a> | Malignant | 11.5 | 60.7 |
| C6  | M | 31 | Skin | Squamous carcinoma                  | cell | I   | <a href="http://www.biomedpub.com/submit/submitImage.php?catalognum=SK801&amp;number=26">http://www.biomedpub.com/submit/submitImage.php?catalognum=SK801&amp;number=26</a> | Malignant | 6.7  | 15.6 |
| C7  | M | 76 | Skin | Squamous carcinoma                  | cell | I   | <a href="http://www.biomedpub.com/submit/submitImage.php?catalognum=SK801&amp;number=27">http://www.biomedpub.com/submit/submitImage.php?catalognum=SK801&amp;number=27</a> | Malignant | 7.7  | 38.5 |
| C8  | F | 84 | Skin | Squamous carcinoma                  | cell | II  | <a href="http://www.biomedpub.com/submit/submitImage.php?catalognum=SK801&amp;number=28">http://www.biomedpub.com/submit/submitImage.php?catalognum=SK801&amp;number=28</a> | Malignant | 7.5  | 32.9 |
| C9  | M | 46 | Skin | Squamous carcinoma                  | cell | III | <a href="http://www.biomedpub.com/submit/submitImage.php?catalognum=SK801&amp;number=29">http://www.biomedpub.com/submit/submitImage.php?catalognum=SK801&amp;number=29</a> | Malignant | X    | X    |
| C10 | F | 62 | Skin | Squamous carcinoma                  | cell | II  | <a href="http://www.biomedpub.com/submit/submitImage.php?catalognum=SK801&amp;number=30">http://www.biomedpub.com/submit/submitImage.php?catalognum=SK801&amp;number=30</a> | Malignant | 15.8 | 37.1 |
| D1  | M | 73 | Skin | Squamous carcinoma                  | cell | II  | <a href="http://www.biomedpub.com/submit/submitImage.php?catalognum=SK801&amp;number=31">http://www.biomedpub.com/submit/submitImage.php?catalognum=SK801&amp;number=31</a> | Malignant | 8.4  | 19.2 |
| D2  | F | 64 | Skin | Squamous carcinoma                  | cell | II  | <a href="http://www.biomedpub.com/submit/submitImage.php?catalognum=SK801&amp;number=32">http://www.biomedpub.com/submit/submitImage.php?catalognum=SK801&amp;number=32</a> | Malignant | 7.5  | 34.6 |
| D3  | F | 90 | Skin | Squamous carcinoma                  | cell | II  | <a href="http://www.biomedpub.com/submit/submitImage.php?catalognum=SK801&amp;number=33">http://www.biomedpub.com/submit/submitImage.php?catalognum=SK801&amp;number=33</a> | Malignant | 6.6  | 29.8 |
| D4  | M | 68 | Skin | Squamous carcinoma                  | cell | II  | <a href="http://www.biomedpub.com/submit/submitImage.php?catalognum=SK801&amp;number=34">http://www.biomedpub.com/submit/submitImage.php?catalognum=SK801&amp;number=34</a> | Malignant | 6.6  | 10.2 |
| D5  | M | 78 | Skin | Squamous carcinoma                  | cell | II  | <a href="http://www.biomedpub.com/submit/submitImage.php?catalognum=SK801&amp;number=35">http://www.biomedpub.com/submit/submitImage.php?catalognum=SK801&amp;number=35</a> | Malignant | 10.9 | 35.9 |
| D6  | M | 51 | Skin | Squamous carcinoma                  | cell | II  | <a href="http://www.biomedpub.com/submit/submitImage.php?catalognum=SK801&amp;number=36">http://www.biomedpub.com/submit/submitImage.php?catalognum=SK801&amp;number=36</a> | Malignant | 8.8  | 51.0 |
| D7  | M | 58 | Skin | Squamous carcinoma                  | cell | II  | <a href="http://www.biomedpub.com/submit/submitImage.php?catalognum=SK801&amp;number=37">http://www.biomedpub.com/submit/submitImage.php?catalognum=SK801&amp;number=37</a> | Malignant | 6.0  | 45.2 |
| D8  | M | 58 | Skin | Squamous carcinoma                  | cell | II  | <a href="http://www.biomedpub.com/submit/submitImage.php?catalognum=SK801&amp;number=38">http://www.biomedpub.com/submit/submitImage.php?catalognum=SK801&amp;number=38</a> | Malignant | 7.7  | 51.5 |
| D9  | M | 67 | Skin | Squamous carcinoma                  | cell | II  | <a href="http://www.biomedpub.com/submit/submitImage.php?catalognum=SK801&amp;number=39">http://www.biomedpub.com/submit/submitImage.php?catalognum=SK801&amp;number=39</a> | Malignant | X    | X    |
| D10 | M | 67 | Skin | Squamous carcinoma                  | cell | II  | <a href="http://www.biomedpub.com/submit/submitImage.php?catalognum=SK801&amp;number=40">http://www.biomedpub.com/submit/submitImage.php?catalognum=SK801&amp;number=40</a> | Malignant | 7.4  | 12.4 |
| E1  | M | 54 | Skin | Squamous carcinoma                  | cell | I   | <a href="http://www.biomedpub.com/submit/submitImage.php?catalognum=SK801&amp;number=41">http://www.biomedpub.com/submit/submitImage.php?catalognum=SK801&amp;number=41</a> | Malignant | 9.9  | 22.6 |
| E2  | M | 67 | Skin | Squamous carcinoma                  | cell | II  | <a href="http://www.biomedpub.com/submit/submitImage.php?catalognum=SK801&amp;number=42">http://www.biomedpub.com/submit/submitImage.php?catalognum=SK801&amp;number=42</a> | Malignant | 7.0  | 53.4 |
| E3  | F | 66 | Skin | Squamous carcinoma                  | cell | III | <a href="http://www.biomedpub.com/submit/submitImage.php?catalognum=SK801&amp;number=43">http://www.biomedpub.com/submit/submitImage.php?catalognum=SK801&amp;number=43</a> | Malignant | 6.3  | 14.4 |
| E4  | M | 45 | Skin | Squamous carcinoma                  | cell | III | <a href="http://www.biomedpub.com/submit/submitImage.php?catalognum=SK801&amp;number=44">http://www.biomedpub.com/submit/submitImage.php?catalognum=SK801&amp;number=44</a> | Malignant | 5.6  | 19.2 |
| E5  | M | 72 | Skin | Squamous carcinoma                  | cell | III | <a href="http://www.biomedpub.com/submit/submitImage.php?catalognum=SK801&amp;number=45">http://www.biomedpub.com/submit/submitImage.php?catalognum=SK801&amp;number=45</a> | Malignant | 11.3 | 45.6 |
| E6  | M | 70 | Skin | Basal carcinoma                     | cell | -   | <a href="http://www.biomedpub.com/submit/submitImage.php?catalognum=SK801&amp;number=46">http://www.biomedpub.com/submit/submitImage.php?catalognum=SK801&amp;number=46</a> | Malignant | 11.3 | 54.1 |
| E7  | M | 48 | Skin | Basal carcinoma                     | cell | -   | <a href="http://www.biomedpub.com/submit/submitImage.php?catalognum=SK801&amp;number=47">http://www.biomedpub.com/submit/submitImage.php?catalognum=SK801&amp;number=47</a> | Malignant | 8.5  | 18.1 |
| E8  | F | 74 | Skin | Basal carcinoma                     | cell | -   | <a href="http://www.biomedpub.com/submit/submitImage.php?catalognum=SK801&amp;number=48">http://www.biomedpub.com/submit/submitImage.php?catalognum=SK801&amp;number=48</a> | Malignant | 7.9  | 14.1 |
| E9  | M | 40 | Skin | Basal carcinoma                     | cell | -   | <a href="http://www.biomedpub.com/submit/submitImage.php?catalognum=SK801&amp;number=49">http://www.biomedpub.com/submit/submitImage.php?catalognum=SK801&amp;number=49</a> | Malignant | 7.7  | 9.8  |
| E10 | M | 75 | Skin | Basal carcinoma                     | cell | -   | <a href="http://www.biomedpub.com/submit/submitImage.php?catalognum=SK801&amp;number=50">http://www.biomedpub.com/submit/submitImage.php?catalognum=SK801&amp;number=50</a> | Malignant | X    | X    |
| F1  | M | 48 | Skin | Basal carcinoma                     | cell | -   | <a href="http://www.biomedpub.com/submit/submitImage.php?catalognum=SK801&amp;number=51">http://www.biomedpub.com/submit/submitImage.php?catalognum=SK801&amp;number=51</a> | Malignant | 9.0  | 26.7 |
| F2  | M | 60 | Skin | Basal carcinoma                     | cell | -   | <a href="http://www.biomedpub.com/submit/submitImage.php?catalognum=SK801&amp;number=52">http://www.biomedpub.com/submit/submitImage.php?catalognum=SK801&amp;number=52</a> | Malignant | 14.9 | 47.4 |
| F3  | M | 71 | Skin | Basal carcinoma                     | cell | -   | <a href="http://www.biomedpub.com/submit/submitImage.php?catalognum=SK801&amp;number=53">http://www.biomedpub.com/submit/submitImage.php?catalognum=SK801&amp;number=53</a> | Malignant | 6.4  | 24.2 |
| F4  | M | 63 | Skin | Basal carcinoma                     | cell | -   | <a href="http://www.biomedpub.com/submit/submitImage.php?catalognum=SK801&amp;number=54">http://www.biomedpub.com/submit/submitImage.php?catalognum=SK801&amp;number=54</a> | Malignant | 10.7 | 23.8 |

|     |   |    |      |                                      |   |                                                                                                                                                                     |           |      |      |
|-----|---|----|------|--------------------------------------|---|---------------------------------------------------------------------------------------------------------------------------------------------------------------------|-----------|------|------|
| F5  | F | 73 | Skin | Basal carcinoma cell                 | - | <a href="http://www.biomax.us/tissue-array-image.php?catalognum=SK801&amp;number=55">http://www.biomax.us/tissue-array-image.php?catalognum=SK801&amp;number=55</a> | Malignant | 10.7 | 11.7 |
| F6  | M | 67 | Skin | Basal carcinoma cell                 | - | <a href="http://www.biomax.us/tissue-array-image.php?catalognum=SK801&amp;number=56">http://www.biomax.us/tissue-array-image.php?catalognum=SK801&amp;number=56</a> | Malignant | 11.3 | 24.8 |
| F7  | F | 57 | Skin | Basal carcinoma cell                 | - | <a href="http://www.biomax.us/tissue-array-image.php?catalognum=SK801&amp;number=57">http://www.biomax.us/tissue-array-image.php?catalognum=SK801&amp;number=57</a> | Malignant | 10.0 | 15.7 |
| F8  | M | 76 | Skin | Basal carcinoma cell                 | - | <a href="http://www.biomax.us/tissue-array-image.php?catalognum=SK801&amp;number=58">http://www.biomax.us/tissue-array-image.php?catalognum=SK801&amp;number=58</a> | Malignant | 12.1 | 21.0 |
| F9  | F | 82 | Skin | Basal carcinoma cell                 | - | <a href="http://www.biomax.us/tissue-array-image.php?catalognum=SK801&amp;number=59">http://www.biomax.us/tissue-array-image.php?catalognum=SK801&amp;number=59</a> | Malignant | 10.1 | 9.9  |
| F10 | F | 47 | Skin | Malignant melanoma                   | - | <a href="http://www.biomax.us/tissue-array-image.php?catalognum=SK801&amp;number=60">http://www.biomax.us/tissue-array-image.php?catalognum=SK801&amp;number=60</a> | Malignant | 11.3 | 36.7 |
| G1  | M | 62 | Skin | Malignant melanoma                   | - | <a href="http://www.biomax.us/tissue-array-image.php?catalognum=SK801&amp;number=61">http://www.biomax.us/tissue-array-image.php?catalognum=SK801&amp;number=61</a> | Malignant | 10.5 | 22.0 |
| G2  | F | 43 | Skin | Malignant melanoma                   | - | <a href="http://www.biomax.us/tissue-array-image.php?catalognum=SK801&amp;number=62">http://www.biomax.us/tissue-array-image.php?catalognum=SK801&amp;number=62</a> | Malignant | 19.0 | 47.0 |
| G3  | M | 45 | Skin | Malignant melanoma                   | - | <a href="http://www.biomax.us/tissue-array-image.php?catalognum=SK801&amp;number=63">http://www.biomax.us/tissue-array-image.php?catalognum=SK801&amp;number=63</a> | Malignant | 12.3 | 26.4 |
| G4  | M | 25 | Skin | Malignant melanoma                   | - | <a href="http://www.biomax.us/tissue-array-image.php?catalognum=SK801&amp;number=64">http://www.biomax.us/tissue-array-image.php?catalognum=SK801&amp;number=64</a> | Malignant | 11.4 | 20.0 |
| G5  | M | 49 | Skin | Malignant melanoma                   | - | <a href="http://www.biomax.us/tissue-array-image.php?catalognum=SK801&amp;number=65">http://www.biomax.us/tissue-array-image.php?catalognum=SK801&amp;number=65</a> | Malignant | 11.0 | 24.5 |
| G6  | F | 66 | Skin | Malignant melanoma                   | - | <a href="http://www.biomax.us/tissue-array-image.php?catalognum=SK801&amp;number=66">http://www.biomax.us/tissue-array-image.php?catalognum=SK801&amp;number=66</a> | Malignant | 7.9  | 21.0 |
| G7  | M | 71 | Skin | Malignant melanoma                   | - | <a href="http://www.biomax.us/tissue-array-image.php?catalognum=SK801&amp;number=67">http://www.biomax.us/tissue-array-image.php?catalognum=SK801&amp;number=67</a> | Malignant | 7.9  | 21.0 |
| G8  | F | 72 | Skin | Malignant melanoma                   | - | <a href="http://www.biomax.us/tissue-array-image.php?catalognum=SK801&amp;number=68">http://www.biomax.us/tissue-array-image.php?catalognum=SK801&amp;number=68</a> | Malignant | 9.7  | 13.5 |
| G9  | M | 64 | Skin | Sweat gland carcinoma                | - | <a href="http://www.biomax.us/tissue-array-image.php?catalognum=SK801&amp;number=69">http://www.biomax.us/tissue-array-image.php?catalognum=SK801&amp;number=69</a> | Malignant | 5.6  | 11.1 |
| G10 | F | 65 | Skin | Malignant trichoepithelioma          | - | <a href="http://www.biomax.us/tissue-array-image.php?catalognum=SK801&amp;number=70">http://www.biomax.us/tissue-array-image.php?catalognum=SK801&amp;number=70</a> | Malignant | 9.6  | 20.8 |
| H1  | M | 45 | Skin | Matched normal skin tissue of No. 01 | - | <a href="http://www.biomax.us/tissue-array-image.php?catalognum=SK801&amp;number=71">http://www.biomax.us/tissue-array-image.php?catalognum=SK801&amp;number=71</a> | Normal    | 30.5 | 10.1 |
| H2  | M | 47 | Skin | Matched normal skin tissue of No. 02 | - | <a href="http://www.biomax.us/tissue-array-image.php?catalognum=SK801&amp;number=72">http://www.biomax.us/tissue-array-image.php?catalognum=SK801&amp;number=72</a> | Normal    | 15.1 | 7.8  |
| H3  | M | 66 | Skin | Matched normal skin tissue of No. 03 | - | <a href="http://www.biomax.us/tissue-array-image.php?catalognum=SK801&amp;number=73">http://www.biomax.us/tissue-array-image.php?catalognum=SK801&amp;number=73</a> | Normal    | 18.5 | 15.7 |
| H4  | M | 71 | Skin | Matched normal skin tissue of No. 04 | - | <a href="http://www.biomax.us/tissue-array-image.php?catalognum=SK801&amp;number=74">http://www.biomax.us/tissue-array-image.php?catalognum=SK801&amp;number=74</a> | Normal    | 18.3 | 0.0  |
| H5  | M | 52 | Skin | Matched normal skin tissue of No. 05 | - | <a href="http://www.biomax.us/tissue-array-image.php?catalognum=SK801&amp;number=75">http://www.biomax.us/tissue-array-image.php?catalognum=SK801&amp;number=75</a> | Normal    | 33.7 | 18.2 |
| H6  | F | 75 | Skin | Matched normal skin tissue of No. 06 | - | <a href="http://www.biomax.us/tissue-array-image.php?catalognum=SK801&amp;number=76">http://www.biomax.us/tissue-array-image.php?catalognum=SK801&amp;number=76</a> | Normal    | 20.4 | 10.1 |
| H7  | M | 53 | Skin | Matched normal skin tissue of No. 07 | - | <a href="http://www.biomax.us/tissue-array-image.php?catalognum=SK801&amp;number=77">http://www.biomax.us/tissue-array-image.php?catalognum=SK801&amp;number=77</a> | Normal    | 35.4 | 25.2 |
| H8  | M | 63 | Skin | Unmatched normal skin tissue         | - | <a href="http://www.biomax.us/tissue-array-image.php?catalognum=SK801&amp;number=78">http://www.biomax.us/tissue-array-image.php?catalognum=SK801&amp;number=78</a> | Normal    | 22.7 | 8.2  |
| H9  | M | 73 | Skin | Unmatched Keratotic matter           | - | <a href="http://www.biomax.us/tissue-array-image.php?catalognum=SK801&amp;number=79">http://www.biomax.us/tissue-array-image.php?catalognum=SK801&amp;number=79</a> | Normal    | 12.1 | 20.3 |
| H10 | M | 42 | Skin | Unmatched normal skin tissue         | - | <a href="http://www.biomax.us/tissue-array-image.php?catalognum=SK801&amp;number=80">http://www.biomax.us/tissue-array-image.php?catalognum=SK801&amp;number=80</a> | Normal    | 28.6 | 0.5  |

**SI Appendix, Table S8.** List of putative STAT2 target genes from RNA-Seq analysis.

|    | genes     | F7-wt    | F7-KO    | F7-KO (shS-S2) |
|----|-----------|----------|----------|----------------|
| 1  | ABCB8     | 0.83268  | 0.5736   | -1.406280851   |
| 2  | ACAA1     | 1.001115 | -1.36562 | 0.364500824    |
| 3  | ADAMTS3   | NaN      | NaN      | NaN            |
| 4  | ADAMTS6   | -0.62666 | 1.411271 | -0.784607462   |
| 5  | ADPRHL2   | 1.391834 | -0.91294 | -0.478893574   |
| 6  | AIM2      | -0.70711 | -0.70711 | 1.414213562    |
| 7  | AKT2      | -1.38237 | 0.949627 | 0.432742085    |
| 8  | ANKFY1    | 1.275362 | -1.16691 | -0.108447229   |
| 9  | ANKRD45   | -1.40566 | 0.568355 | 0.83730825     |
| 10 | ANXA2R    | 0.009314 | -1.22938 | 1.220061251    |
| 11 | APOL1     | -1.38759 | 0.930315 | 0.457277483    |
| 12 | APOL2     | -0.598   | 1.408864 | -0.810862048   |
| 13 | APOL6     | 1.378654 | -0.96225 | -0.416407969   |
| 14 | ARHGAP11B | -1.33746 | 0.270747 | 1.066717       |
| 15 | ARL5B     | -1.22451 | 1.224977 | -0.000464078   |

|    |           |          |          |              |
|----|-----------|----------|----------|--------------|
| 16 | ARRDC4    | 1.275519 | -1.16671 | -0.108809768 |
| 17 | ATP13A1   | -0.88963 | -0.50725 | 1.396875756  |
| 18 | AZI2      | 1.209726 | -1.23923 | 0.029505397  |
| 19 | B2M       | 1.148618 | -1.28881 | 0.140188657  |
| 20 | BAG1      | 1.328835 | -1.08352 | -0.245313955 |
| 21 | BAK1      | 0.879279 | -1.39888 | 0.519605802  |
| 22 | BATF2     | 1.412742 | -0.6505  | -0.762236882 |
| 23 | BLZF1     | -1.39892 | 0.519813 | 0.879104616  |
| 24 | BRCA2     | -1.28868 | 0.139881 | 1.148798642  |
| 25 | BST2      | 1.39672  | -0.50632 | -0.890401577 |
| 26 | BUB1      | -0.78554 | -0.62566 | 1.411197655  |
| 27 | C14orf159 | -0.13565 | -1.15127 | 1.286922349  |
| 28 | C17orf62  | 1.235325 | -1.21388 | -0.021442409 |
| 29 | C19orf66  | 1.366408 | -0.99895 | -0.36745666  |
| 30 | C5orf48   | NaN      | NaN      | NaN          |
| 31 | CBX3      | -0.7071  | -0.70711 | 1.414213562  |
| 32 | CCDC9     | -1.3801  | 0.957437 | 0.422661763  |
| 33 | CD274     | -1.35419 | 0.324061 | 1.030126422  |
| 34 | CD33      | 1.402631 | -0.54489 | -0.857744513 |
| 35 | CD68      | -0.65351 | -0.75938 | 1.412892156  |
| 36 | CDK17     | -1.2614  | 0.07694  | 1.184461247  |
| 37 | CHMP5     | -1.3801  | 0.422679 | 0.957423121  |
| 38 | CMPK2     | 1.281768 | -1.15838 | -0.123387577 |
| 39 | CNP       | 1.402968 | -0.54734 | -0.855626517 |
| 40 | CREBRF    | -0.63684 | 1.411959 | -0.775114172 |
| 41 | CRKL      | 1.384342 | -0.44178 | -0.942566707 |
| 42 | CSFI      | -1.32174 | 1.096477 | 0.225262623  |
| 43 | CUTA      | 0.08361  | 1.180797 | -1.264407767 |
| 44 | CWF19L1   | -1.03226 | -0.32102 | 1.35328364   |
| 45 | DCLRE1C   | 0.422876 | 0.957271 | -1.380147601 |
| 46 | DCP1A     | -0.84128 | 1.405112 | -0.563832254 |
| 47 | DDX3X     | 1.36222  | -1.01015 | -0.352069427 |
| 48 | DDX58     | -1.38072 | 0.425403 | 0.955319764  |
| 49 | DDX60     | -1.38305 | 0.43581  | 0.9472356    |
| 50 | DDX60L    | -1.3909  | 0.916917 | 0.473983137  |
| 51 | DGCR8     | 0.76856  | 0.643819 | -1.412378575 |
| 52 | DGKE      | -1.11517 | 1.310777 | -0.195607329 |
| 53 | DHX15     | -1.35594 | 0.330004 | 1.025931345  |
| 54 | DHX58     | 0.331662 | -1.35642 | 1.024757071  |
| 55 | DNAJA1    | 1.402264 | -0.86001 | -0.542257205 |
| 56 | DTX3L     | 0.903343 | -1.394   | 0.490654215  |
| 57 | EARS2     | 1.363966 | -1.00555 | -0.358411191 |
| 58 | ECE1      | -1.37565 | 0.9719   | 0.403744772  |
| 59 | EHD4      | -1.41341 | 0.748091 | 0.665315007  |
| 60 | EIF2AK2   | 1.314216 | -0.20475 | -1.109464723 |
| 61 | ENY2      | 1.413844 | -0.67891 | -0.734935868 |
| 62 | EPSTI1    | -1.08877 | -0.23724 | 1.326009071  |
| 63 | EXOSC9    | -1.36203 | 1.010655 | 0.351370736  |
| 64 | FAM20B    | -0.27336 | 1.338327 | -1.064966855 |
| 65 | FAM46A    | 1.289499 | -1.14764 | -0.141863084 |
| 66 | FBXO36    | -1.39871 | 0.880201 | 0.518509911  |
| 67 | FOXP1     | -1.33528 | 1.071091 | 0.264187197  |
| 68 | GCLM      | 0.069322 | -1.25793 | 1.188611538  |
| 69 | GMPR      | 0.614519 | 0.795816 | -1.410334668 |
| 70 | GNB4      | -1.39451 | 0.900968 | 0.493546176  |
| 71 | GNG5      | 1.351192 | -0.31406 | -1.037134829 |
| 72 | GSTK1     | -1.41322 | 0.75247  | 0.660751994  |
| 73 | GTPBP2    | -1.38592 | 0.936712 | 0.44921034   |
| 74 | HELZ2     | -1.4136  | 0.670757 | 0.742844237  |
| 75 | HEMGN     | NaN      | NaN      | NaN          |
| 76 | HERC5     | -1.38099 | 0.954402 | 0.42658951   |
| 77 | HERC6     | -1.33209 | 1.077331 | 0.254755749  |
| 78 | HEXDC     | -1.41183 | 0.776957 | 0.6348756    |
| 79 | HIRA      | 0.48815  | -1.39355 | 0.905395468  |
| 80 | HLA-E     | 1.414049 | -0.72568 | -0.688365813 |
| 81 | HNRNPA2B1 | -1.11066 | 1.313501 | -0.202837776 |

|     |           |          |          |              |
|-----|-----------|----------|----------|--------------|
| 82  | HNRNPD    | -0.95367 | -0.42753 | 1.381204371  |
| 83  | HNRNPR    | -1.31998 | 1.099575 | 0.220407718  |
| 84  | HSPA1L    | -0.70711 | 1.414214 | -0.707106781 |
| 85  | ICAM1     | 0.639002 | -1.41209 | 0.773091286  |
| 86  | IFI16     | 1.368948 | -0.99186 | -0.377087557 |
| 87  | IFI27     | 1.411803 | -0.77739 | -0.63441571  |
| 88  | IFI35     | -1.0383  | -0.31239 | 1.350685332  |
| 89  | IFI44L    | 1.414214 | -0.70711 | -0.707106781 |
| 90  | IFI6      | 1.412563 | -0.64712 | -0.76544241  |
| 91  | IFIH1     | -0.57471 | -0.8317  | 1.406409105  |
| 92  | IFIT1     | 0.848584 | -1.40405 | 0.555467754  |
| 93  | IFIT2     | 1.312411 | -1.11248 | -0.199935884 |
| 94  | IFIT3     | 0.297769 | -1.34617 | 1.048404109  |
| 95  | IFIT5     | 1.236348 | -1.2128  | -0.023545012 |
| 96  | IFITM1    | 1.405163 | -0.56424 | -0.840923679 |
| 97  | IFITM2    | 1.367919 | -0.37316 | -0.994763296 |
| 98  | IFITM3    | 1.413735 | -0.67501 | -0.738723374 |
| 99  | IRF1      | -1.41416 | 0.695972 | 0.718183641  |
| 100 | IRF2      | 1.296257 | -1.13781 | -0.158447434 |
| 101 | IRF7      | -0.80566 | -0.60374 | 1.409399941  |
| 102 | IRF9      | 1.404847 | -0.5617  | -0.843148061 |
| 103 | ISG15     | -1.38545 | 0.938495 | 0.44695116   |
| 104 | ISG20     | -1.25307 | 1.194305 | 0.058763899  |
| 105 | KCTD14    | 1.389844 | -0.46854 | -0.921305595 |
| 106 | KIF2A     | 0.848681 | 0.555356 | -1.404037042 |
| 107 | KLHL6     | NaN      | NaN      | NaN          |
| 108 | LAP3      | 1.28039  | -0.12015 | -1.160244441 |
| 109 | LGALS3BP  | 1.092392 | -1.32402 | 0.231628371  |
| 110 | LGALS9    | 1.32296  | -1.0943  | -0.228661459 |
| 111 | LNPEP     | 0.5636   | 0.841484 | -1.405083726 |
| 112 | LOC648691 | -1.37539 | 0.402683 | 0.972704623  |
| 113 | LOC728743 | 1.300846 | -0.16995 | -1.130891759 |
| 114 | MAD2L1BP  | -0.0372  | -1.20572 | 1.242919402  |
| 115 | MAGOHB    | -1.37915 | 0.418536 | 0.960612792  |
| 116 | MAK       | -1.06413 | 1.338738 | -0.274609065 |
| 117 | MDC1      | 0.144569 | -1.29061 | 1.146044247  |
| 118 | MED16     | 1.021895 | 0.335692 | -1.357586878 |
| 119 | MOV10     | 1.163323 | 0.114765 | -1.278088042 |
| 120 | MRPL40    | -1.26181 | 0.077848 | 1.18396377   |
| 121 | MT2A      | 0.897084 | 0.498258 | -1.395341974 |
| 122 | MUC1      | -1.35987 | 0.34367  | 1.01619657   |
| 123 | MX1       | 1.355898 | -0.32987 | -1.026024118 |
| 124 | MX2       | -0.70711 | 1.414214 | -0.707106781 |
| 125 | MYD88     | 1.348955 | -1.04223 | -0.306728381 |
| 126 | N4BP1     | -1.24895 | 0.049938 | 1.199012054  |
| 127 | NADK      | -1.37671 | 0.968525 | 0.408188657  |
| 128 | NAMPT     | 1.289654 | -1.14741 | -0.14223948  |
| 129 | NAPA      | 1.18392  | -1.26185 | 0.077927414  |
| 130 | NBN       | -0.91759 | -0.47315 | 1.390740195  |
| 131 | NCOA7     | 1.119898 | 0.187963 | -1.307860394 |
| 132 | NKAIN1    | 1.411852 | -0.63518 | -0.776669646 |
| 133 | NME7      | -1.20504 | -0.0385  | 1.243540108  |
| 134 | NUDCD1    | 0.6325   | -1.41168 | 0.779176053  |
| 135 | OAS1      | 1.408617 | -0.59546 | -0.813160744 |
| 136 | OAS2      | NaN      | NaN      | NaN          |
| 137 | OAS3      | 1.397696 | -0.51221 | -0.885488109 |
| 138 | OASL      | -1.21133 | -0.0264  | 1.237729313  |
| 139 | OGFOD3    | 1.315727 | -0.20881 | -1.106914236 |
| 140 | OGFR      | 1.338316 | -1.06499 | -0.273327753 |
| 141 | PARP10    | 1.411763 | -0.77795 | -0.633811585 |
| 142 | PARP12    | 1.331275 | -1.07889 | -0.252383281 |
| 143 | PARP14    | 1.413562 | -0.66961 | -0.743949641 |
| 144 | PARP9     | 1.413071 | -0.65732 | -0.7557467   |
| 145 | PGAM1     | 1.40894  | -0.5988  | -0.81014341  |
| 146 | PHF11     | 1.288457 | -1.14911 | -0.139343757 |
| 147 | PI4K2B    | -0.89038 | -0.50635 | 1.396724837  |



|     |          |          |          |              |
|-----|----------|----------|----------|--------------|
| 148 | PML      | 1.338586 | -1.06444 | -0.274146552 |
| 149 | PNPT1    | 1.403557 | -0.55171 | -0.851846932 |
| 150 | PNRC2    | -1.35026 | 0.310987 | 1.039271992  |
| 151 | POLR1B   | -0.58105 | -0.82607 | 1.407120987  |
| 152 | POU3F2   | -0.82155 | -0.58612 | 1.407666424  |
| 153 | PPP2R2A  | -1.35225 | 0.317553 | 1.034693499  |
| 154 | PRAME    | 0.091571 | 1.176389 | -1.267960384 |
| 155 | PRKCE    | -1.39612 | 0.893332 | 0.502791491  |
| 156 | PSMA3    | 0.011697 | -1.23055 | 1.218854431  |
| 157 | RANBP1   | -1.03572 | -0.31608 | 1.351804417  |
| 158 | RBBP6    | -1.23348 | 0.017655 | 1.215821692  |
| 159 | RBCK1    | -0.61073 | 1.410017 | -0.799288869 |
| 160 | RBM43    | 0.757006 | -1.41301 | 0.656004905  |
| 161 | RFC2     | 1.307107 | -0.186   | -1.121104506 |
| 162 | RSAD2    | 1.21208  | -1.23703 | 0.024949273  |
| 163 | RTP4     | -0.70711 | -0.70711 | 1.414213562  |
| 164 | SAMD9    | -0.0761  | -1.18492 | 1.26102026   |
| 165 | SAMD9L   | 1.414214 | -0.70711 | -0.707106781 |
| 166 | SAMHD1   | 1.414138 | -0.71971 | -0.694427158 |
| 167 | SAPI30   | -1.4007  | 0.869248 | 0.531453498  |
| 168 | SCAMP1   | 0.769323 | -1.41233 | 0.643008567  |
| 169 | SCN9A    | -1.34577 | 1.04928  | 0.296492074  |
| 170 | SCYL3    | 1.244829 | -0.04121 | -1.203620933 |
| 171 | SDE2     | -1.40948 | 0.804881 | 0.604597537  |
| 172 | SEMA4B   | 0.610533 | -1.41    | 0.799467342  |
| 173 | SLC25A44 | -1.27674 | 0.111637 | 1.165104273  |
| 174 | SLFN12   | -0.98047 | 1.372851 | -0.392386016 |
| 175 | SLFN5    | -1.06756 | -0.26949 | 1.337047927  |
| 176 | SMARCA5  | -1.07535 | -0.25776 | 1.333110888  |
| 177 | SNORA67  | 1.296197 | -0.1583  | -1.137899553 |
| 178 | SP100    | -1.19208 | -0.06291 | 1.254986539  |
| 179 | SP110    | -1.01429 | -0.34632 | 1.360614275  |
| 180 | SP140L   | -1.03796 | -0.31287 | 1.350832316  |
| 181 | SSBP1    | -0.78903 | -0.62189 | 1.410917587  |
| 182 | SSR1     | -1.36359 | 1.006557 | 0.35703138   |
| 183 | STARD5   | 0.362052 | 1.002903 | -1.36495542  |
| 184 | STAT1    | -0.82432 | 1.407334 | -0.583012186 |
| 185 | STAT2    | -1.18653 | 1.259683 | -0.073154657 |
| 186 | STAT3    | -1.07775 | -0.25412 | 1.331870816  |
| 187 | STX16    | -1.36786 | 0.994925 | 0.372935414  |
| 188 | SYNGAP1  | 1.034946 | 0.317191 | -1.352137548 |
| 189 | TDRD7    | -1.24901 | 1.19895  | 0.050055378  |
| 190 | TMEM140  | 0.568355 | -1.40566 | 0.83730825   |
| 191 | TMEM62   | -1.01954 | -0.33899 | 1.358534812  |
| 192 | TMPO     | -1.21841 | -0.01258 | 1.230987293  |
| 193 | TNFSF10  | -1.25776 | 1.188816 | 0.068945091  |
| 194 | TOR1AIP1 | 0.85456  | -1.40314 | 0.548575823  |
| 195 | TRIM14   | 1.39697  | -0.88916 | -0.507811261 |
| 196 | TRIM21   | 1.029129 | -1.35461 | 0.325477601  |
| 197 | TRIM22   | -1.40715 | 0.581313 | 0.825836095  |
| 198 | TRIM25   | -0.34583 | -1.01465 | 1.360475023  |
| 199 | TRIM38   | 0.451698 | 0.934744 | -1.38644222  |
| 200 | TRIM5    | -0.76767 | 1.412432 | -0.644759708 |
| 201 | TRIM56   | 1.195035 | 0.057401 | -1.252435967 |
| 202 | TRIP12   | 0.067107 | -1.25692 | 1.189811936  |
| 203 | TRMT2A   | 1.305758 | -1.12325 | -0.182508893 |
| 204 | TXNIP    | NaN      | NaN      | NaN          |
| 205 | UBA7     | -0.46261 | 1.38867  | -0.926061651 |
| 206 | UBE2L6   | 1.352014 | -0.31678 | -1.035233183 |
| 207 | UBFD1    | 1.411039 | -0.78754 | -0.623496598 |
| 208 | UBR1     | 1.323583 | -0.2304  | -1.093180607 |
| 209 | UNC93B1  | -1.41142 | 0.782645 | 0.628775627  |
| 210 | UNK      | -1.09702 | 1.321432 | -0.224408636 |
| 211 | USF1     | 1.273527 | -1.1693  | -0.104226055 |
| 212 | USP18    | 1.313895 | -1.11    | -0.203890484 |
| 213 | WARS     | -0.96405 | -0.41406 | 1.378104326  |

|     |         |          |          |              |
|-----|---------|----------|----------|--------------|
| 214 | WBP4    | -1.07824 | -0.25338 | 1.331615738  |
| 215 | WDR25   | -0.89636 | 1.395493 | -0.499128827 |
| 216 | XAF1    | -0.70711 | 1.414214 | -0.707106781 |
| 217 | XRN1    | -1.10573 | -0.2107  | 1.316425848  |
| 218 | YDJC    | 1.149509 | -1.28818 | 0.138667291  |
| 219 | ZC3HAV1 | 1.360968 | -0.34758 | -1.013387426 |
| 220 | ZNF107  | 1.175445 | -1.26871 | 0.093266352  |
| 221 | ZNFX1   | 1.013532 | -1.36091 | 0.347378938  |

#### 4. SI Appendix, Figures

##### SI Appendix, Figure S1

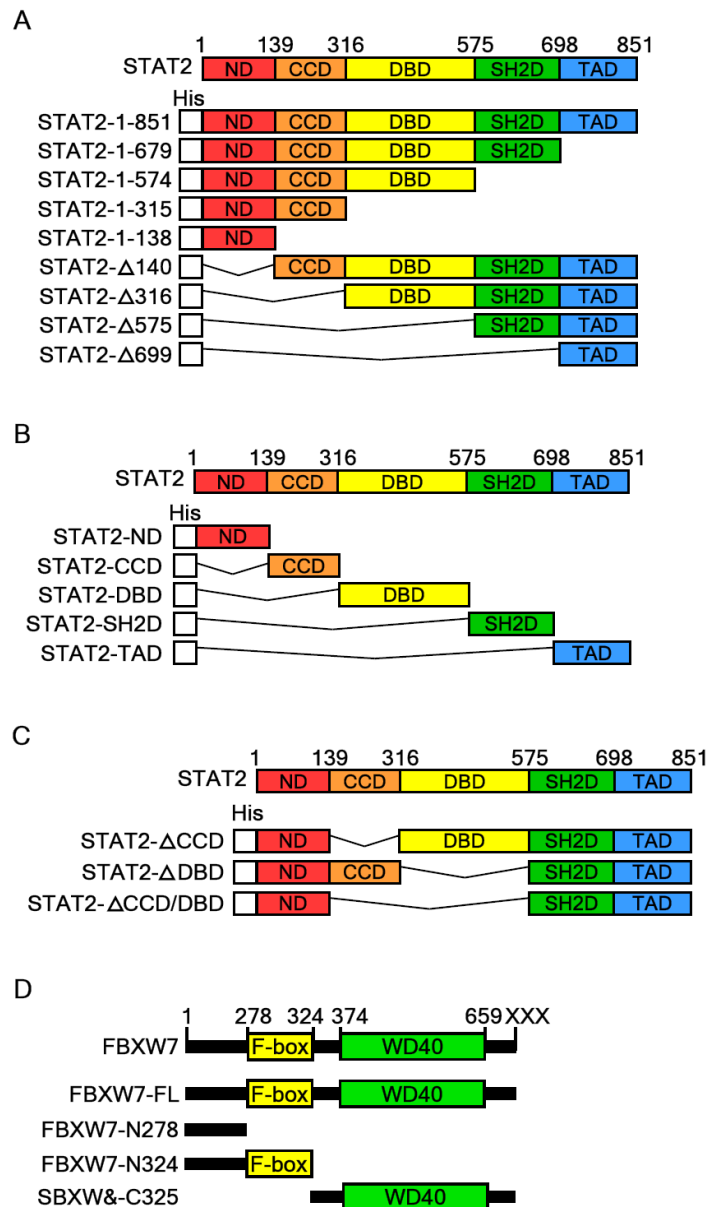

**SI Appendix, Figure S1.** Construction strategies of deletion expression vectors for STAT2 and FBXW7.

(A) Construction strategies for serial deletion mutants of STAT2. (B) Construction strategies for each domain of STAT2. (C) Construction strategies for domain-specific deletion mutants of STAT2. (D) Construction strategies for deletion mutants of FBXW7. (A-C) ND, N-terminal domain; CCD, coiled-coil domain; DBD, DNA binding domain; SH2D, SH2 domain; and TAD, transactivation domain.

**SI Appendix, Figure S2**

Z-Dock score between STAT2 and FBXW7  
(ZRank Score: -48.49 kcal/mol)

| Interaction type          | amino acid |     |       |      | Distance (Å) |
|---------------------------|------------|-----|-------|------|--------------|
|                           | STAT2      |     | FBXW7 |      |              |
| Hydrogen bond             | Arg        | 343 | Asp   | 689  | 2.81         |
|                           | Asn        | 354 | Tyr   | 545  | 3.38         |
|                           | Ser        | 381 | Asp   | 399  | 2.64         |
|                           | Tyr        | 439 | Asn   | 542  | 2.33         |
|                           | Glu        | 355 | Arg   | 465  | 3.17         |
|                           | Gln        | 352 | Arg   | 543  | 2.97         |
|                           | Thr        | 438 | Arg   | 543  | 2.96         |
|                           | Lys        | 390 | Gly   | 669  | 2.81         |
|                           | Glu        | 389 | Arg   | 689  | 2.43         |
|                           | Gly        | 395 | Arg   | 689  | 2.58         |
|                           | Glu        | 389 | Asn   | 690  | 2.50         |
| Ser                       | 381        | Asp | 400   | 3.10 |              |
| Electrostatic interaction | Lys        | 390 | Asp   | 643  | 4.57         |
|                           | Glu        | 352 | Arg   | 543  | 5.56         |
|                           | Glu        | 389 | Arg   | 689  | 3.37         |
|                           | Tyr        | 437 | Arg   | 543  | 2.33         |
|                           | Lys        | 390 | Asp   | 643  | 4.57         |
| Hydrophobic interaction   | Trp        | 384 | His   | 382  | 5.03         |

**SI Appendix, Figure S2.** A STAT2 and FBXW7 docking model showing that non-phospho-amino acids in degreon motifs interacted with WD40 domain of FBXW7. The list of interaction types between non-phospho-amino acids in STAT2 degreon motifs and WD40 domains of FBXW7. The Z rank score means the binding energy in kcal/mol. The atomic distance for bond formation is denoted as Å.

**SI Appendix, Figure S3**

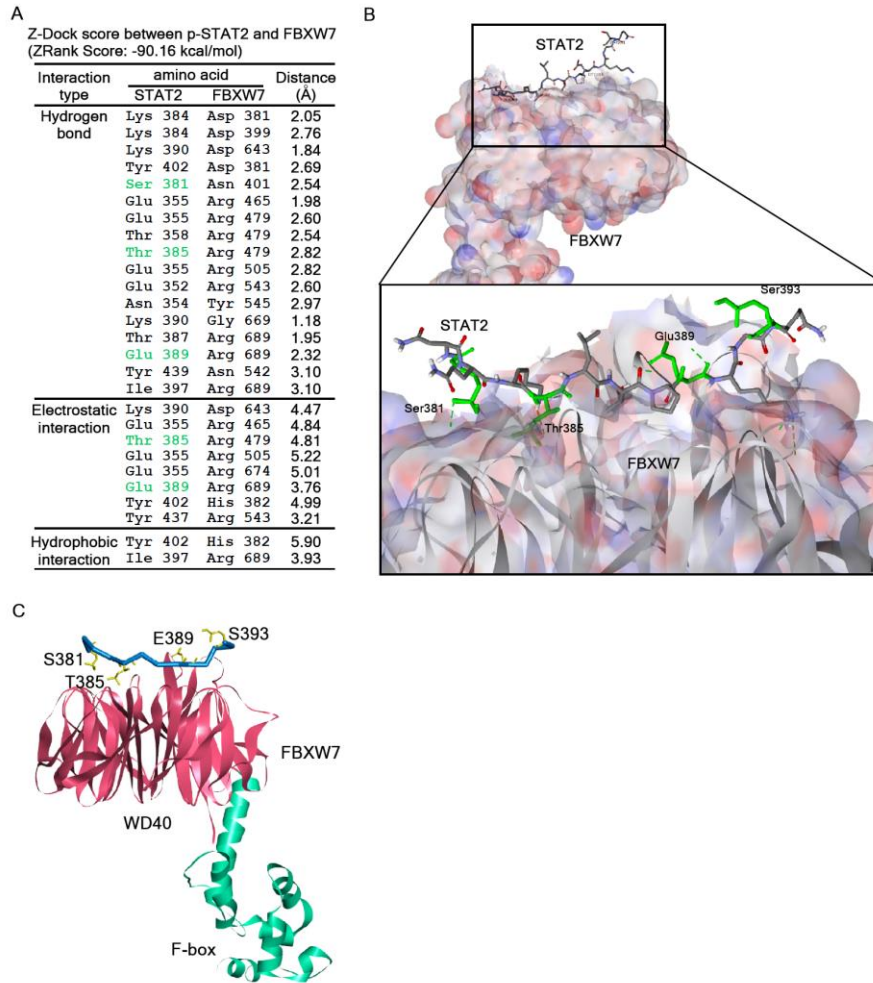

**SI Appendix, Figure S3.** A STAT2 and FBXW7 docking model showing that exchange of phospho-amino acids in degnon motifs reduced binding energy provided by interaction between STAT2 and FBXW7. (A) The list of interaction types between phospho-amino acids in STAT2 degnon motifs and WD40 domain of FBXW7. The Z rank score means the binding energy in kcal/mol. Atomic distances for bond formation is denoted as Å. (B) Closed view of the interaction surface between the phospho-amino acids of the degnon motifs in STAT2 and WD40 domains of FBXW7. Here, the stick indicates the amino acid backbone, green indicates amino acid side chains of STAT2 formed hydrogen bonds FBXW7, and blue indicates the side chains of each amino acid in the degnon motifs of STAT2. FBXW7 denotes the protein surface. The dotted lines indicate the hydrogen bonds between phospho-amino acids of degnon motifs in STAT2 and WD40 domains of FBXW7. (C) Structural view for phospho-amino acids of the degnon motifs in STAT2 to determine the orientation of the side chain in phospho-Ser393 for the degnon motifs of STAT2.

**SI Appendix, Figure S4**

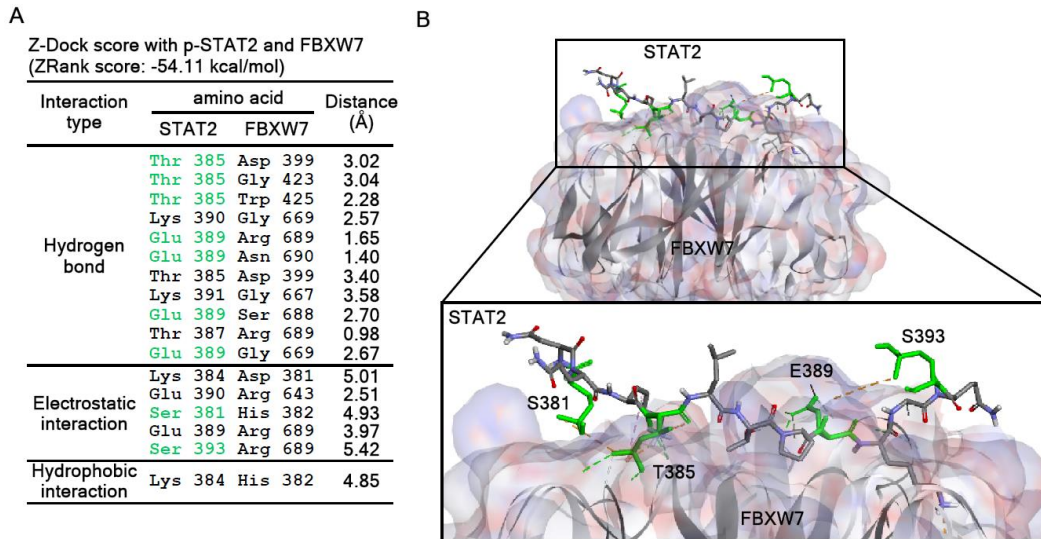

**SI Appendix, Figure S4.** Refinement of a STAT2 and FBXW7 docking model showing that phospho-Ser381, -Thr385, -Ser393, and Glu389A in STAT2 can participate in the interaction between STAT2 and FBXW7. (A) The list of interaction types between phospho-amino acids in STAT2 degnon motifs and WD40 domain of FBXW7. The Z rank score means the binding energy in kcal/mol. Atomic distance for bond formation is denoted as Å. (B) Refined closed view of interaction surface between the phospho-amino acids of degnon motifs in STAT2 and WD40 domains of FBXW7. The stick indicates the amino acid backbone, and the blue stick indicates the side chains of each amino acid in the degnon motifs of STAT2. FBXW7 denotes the protein surface. The dotted lines indicate the hydrogen bonds between phospho-amino acids of the degnon motifs in STAT2 and the WD40 domains of FBXW7. Refined structural view for phospho-amino acids of the degnon motifs in STAT2 shows the orientation of the side chain of phospho-Ser393 in the degnon motifs of STAT2.

**SI Appendix, Figure S5**

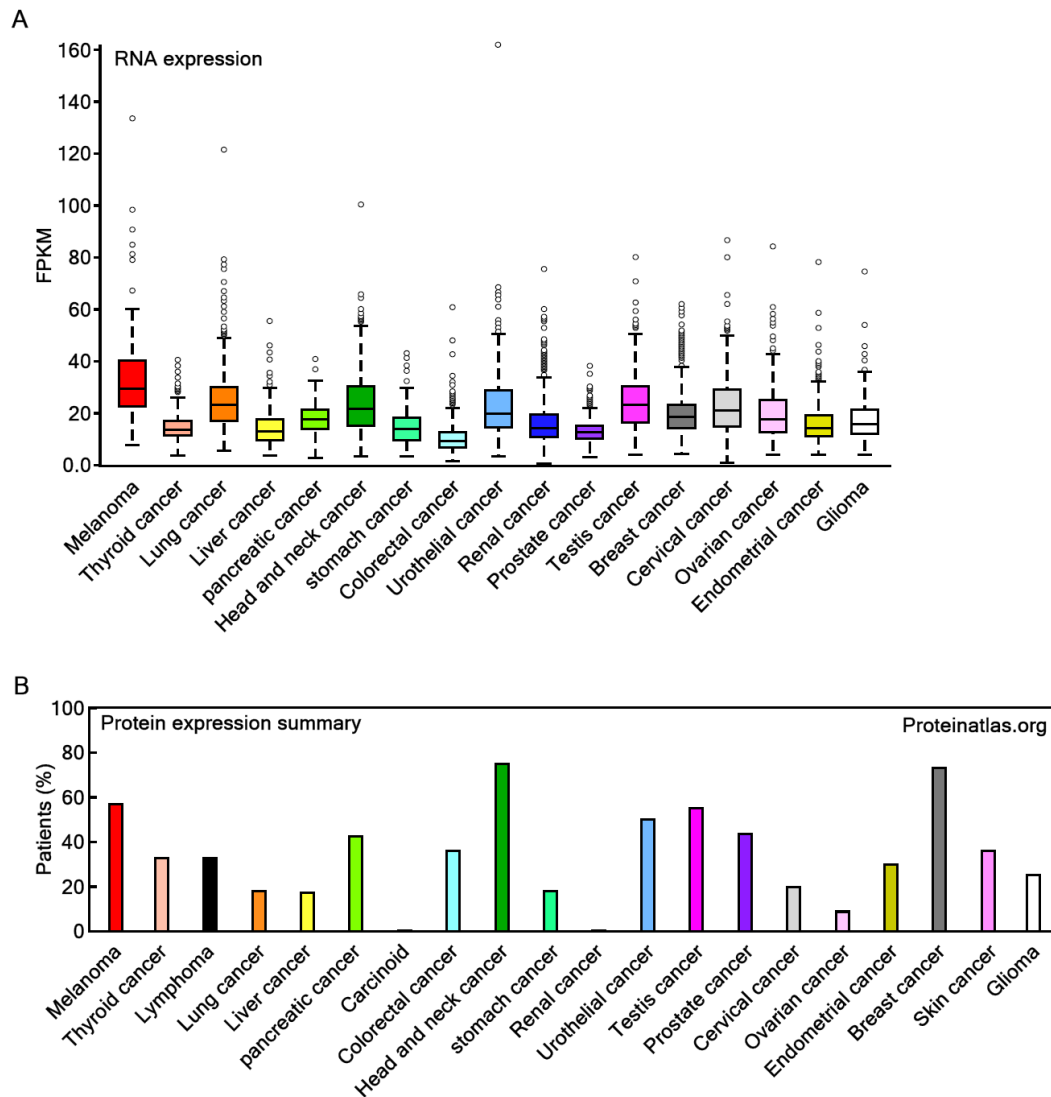

**SI Appendix, Figure S5.** The mRNA and protein levels of STAT2 in melanoma tissues. (A) The mRNA expression of STAT2 was obtained via RNA-seq data generated by the Cancer Genome Atlas (TCGA) using 17 cancer types. (B) The protein content of STAT2 in different cancer types in human. The data was obtained from the Human Protein Atlas database ([www.proteinatlas.org](http://www.proteinatlas.org)).

**SI Appendix, Figure S6**

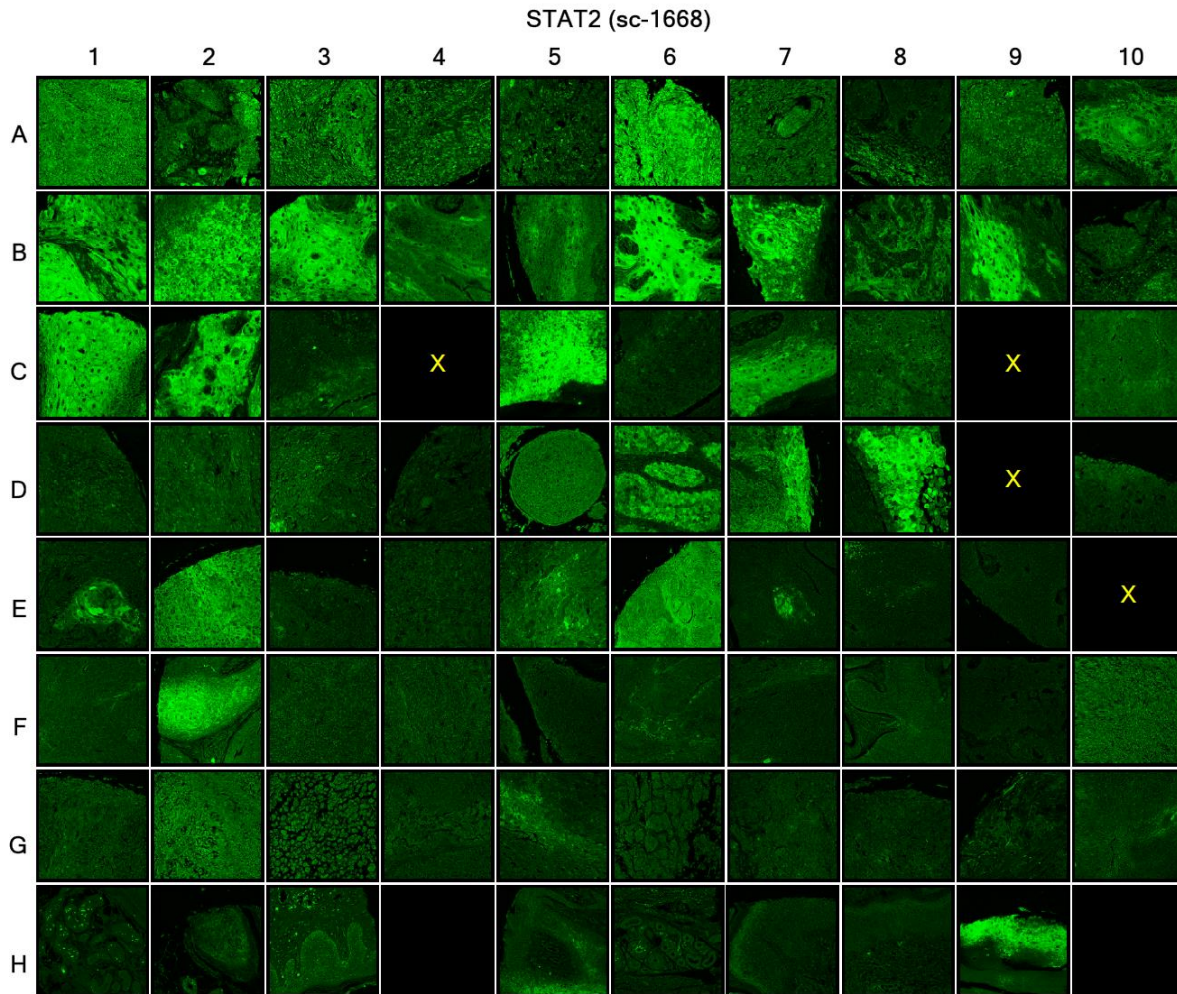

**SI Appendix, Figure S6.** Human skin tissues contain relatively higher levels of STAT2 protein than normal tissues. Human skin tissue arrays were conducted using human skin tissue array set (SK801), which contained 70 human skin cancer tissues and 10 normal tissues. The fluorescence intensity was measured using Image J (NIH Image J ver. 1.52). The STAT2 protein levels in each tissue sample is provided in Figure 7A in the main text. Detailed information including age, sex, grade, and other characteristics can be found at Biomax us (<https://www.biomax.us/tissue-arrays/Skin/SK801>).



**SI Appendix, Figure S7**

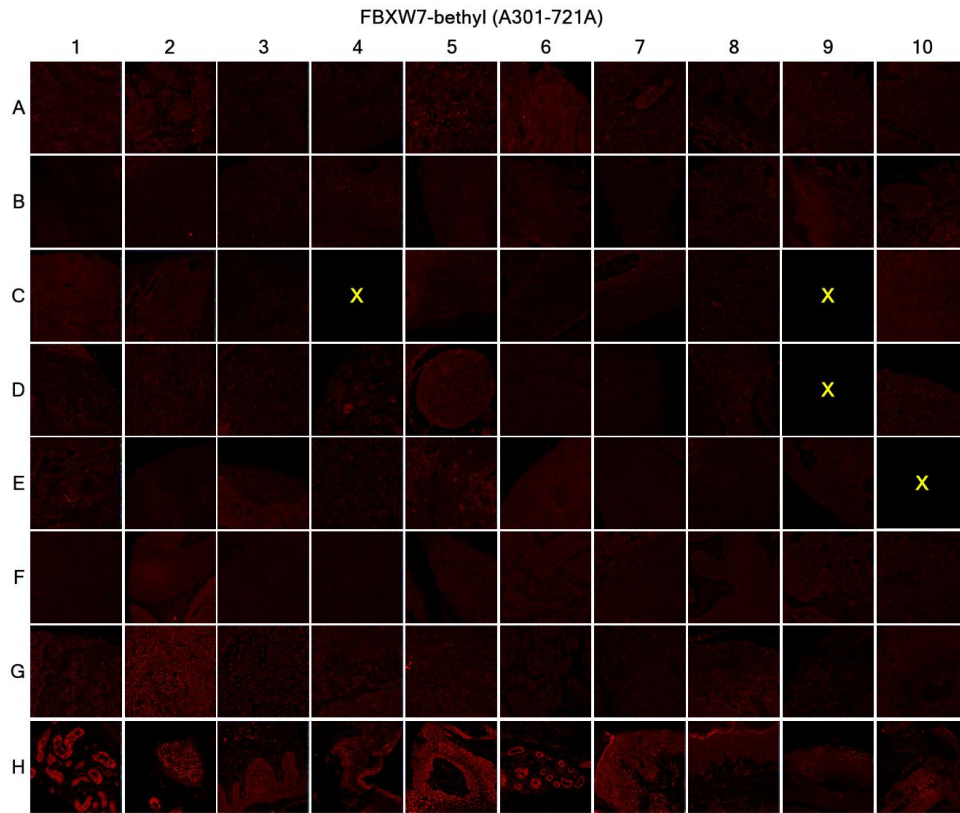

**SI Appendix, Figure S7.** Human skin tissues contain relatively higher levels of FBXW7 protein than normal tissues. Human skin tissue arrays were conducted using human skin tissue array set (SK801), which contained 70 human skin cancer tissues and 10 normal tissues. The fluorescence intensity was measured using Image J (NIH Image J ver. 1.52). The FBXW7 protein levels in each tissue sample is provided in Figure 7A in the main text. Detailed information including age, sex, grade, and other characteristics can be found at Biomax us (<https://www.biomax.us/tissue-arrays/Skin/SK801>).

**SI Appendix, Figure S8**

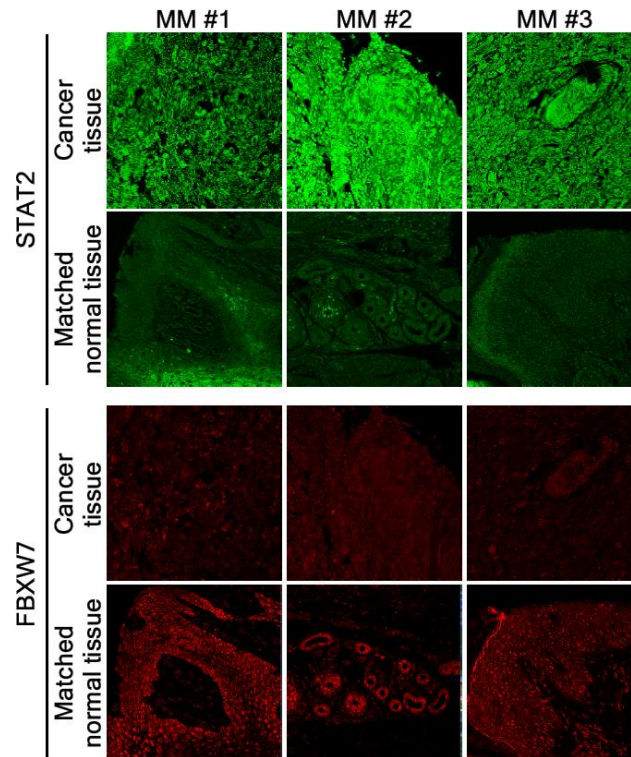

**SI Appendix, Figure S8.** Analysis of STAT2 and FBXW7 protein levels in matched human skin cancer and normal tissues. The SK801 human skin tissue array set contained matched human skin tissues that were biopsied from the same patient. The fluorescence intensity was measured using Image J (NIH Image J ver. 1.52). The fluorescence intensity was compared, and the relative intensity is presented in Figure 7C in the main text. Detailed information for each tissue sample including age, sex, grade, and other characteristics can be found at Biomax us (<https://www.biomax.us/tissue-arrays/Skin/SK801>).

**SI Appendix, Figure S9**

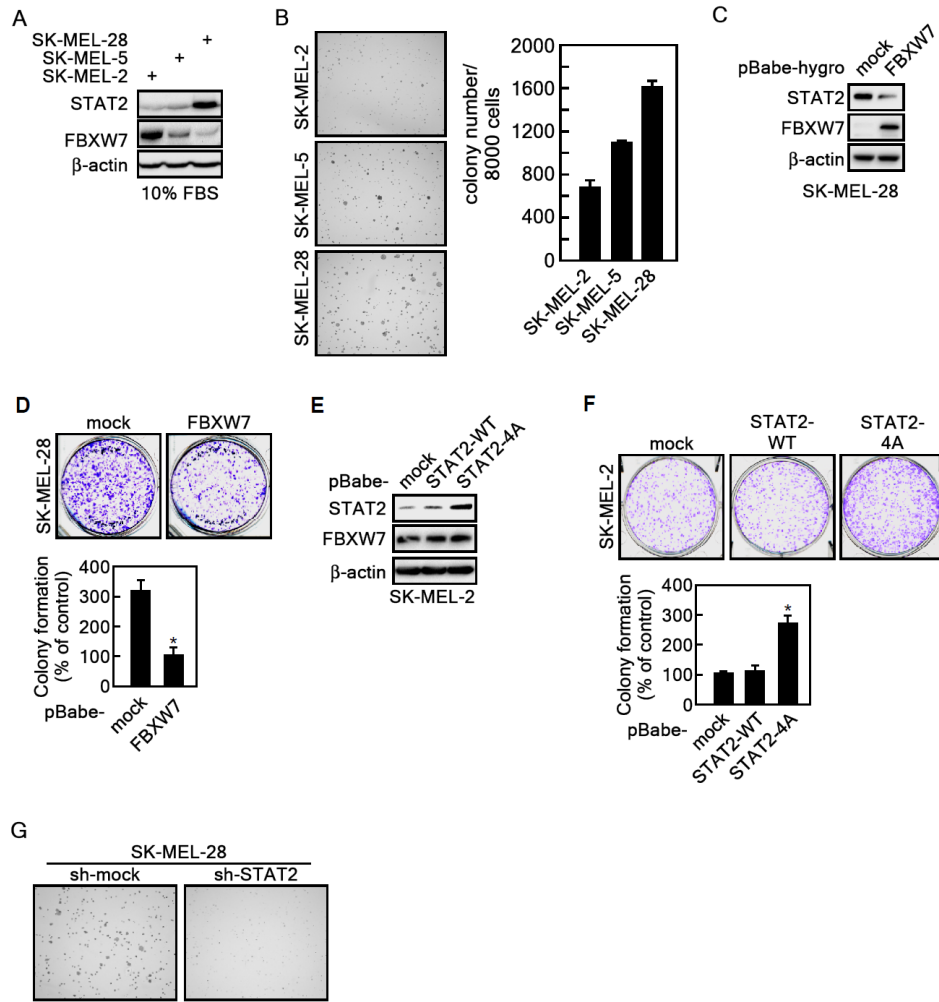

**SI Appendix, Figure S9.** STAT2 induces colony growth of melanoma cells. (A) WB analysis of WCLs derived from human melanoma cell lines SK-MEL-28, SK-MEL-5, and SK-MEL-2. (B) Anchorage-independent colony growth of melanoma cells. *Left panels*: Representative photographs for anchorage-independent colony growth of melanoma cells. *Graph*; average colony numbers obtained from triplicate 6-well plates. (C) Representative photographs to determine the ectopic expression of FBXW7 in SK-MEL-28 melanoma cells. (D) Foci formation assay to determine the effect of FBXW7 overexpression in SK-MEL-28 melanoma cells. *Upper panels*; representative photographs for colony growth by crystal violet staining. *Graph*; average colony numbers obtained from triplicate 6-well plates. (E) Representative photographs to determine the ectopic expression of STAT2-WT or STAT2-4A mutant protein in SK-MEL-2 melanoma cells. (F) Foci formation assay to determine the effect of STAT2-WT or STAT2-4A mutant overexpression in SK-MEL-2 melanoma cells. *Upper panels*; representative photographs for colony growth

by crystal violet staining. *Graph*; average colony numbers obtained from triplicate 6-well plates. (*G*) Representative photographs for the effects of STAT2 knockdown on the anchorage-independent colony growth in SK-MEL-28 cells. (*C*, *E*, *G*, and *H*) Colony numbers were counted using an ECLIPSE Ti inverted microscope and analyzed by NIS-Elements AR (V. 4.0) software.

## 5. Si Appendix, Whole blots

Fig.1

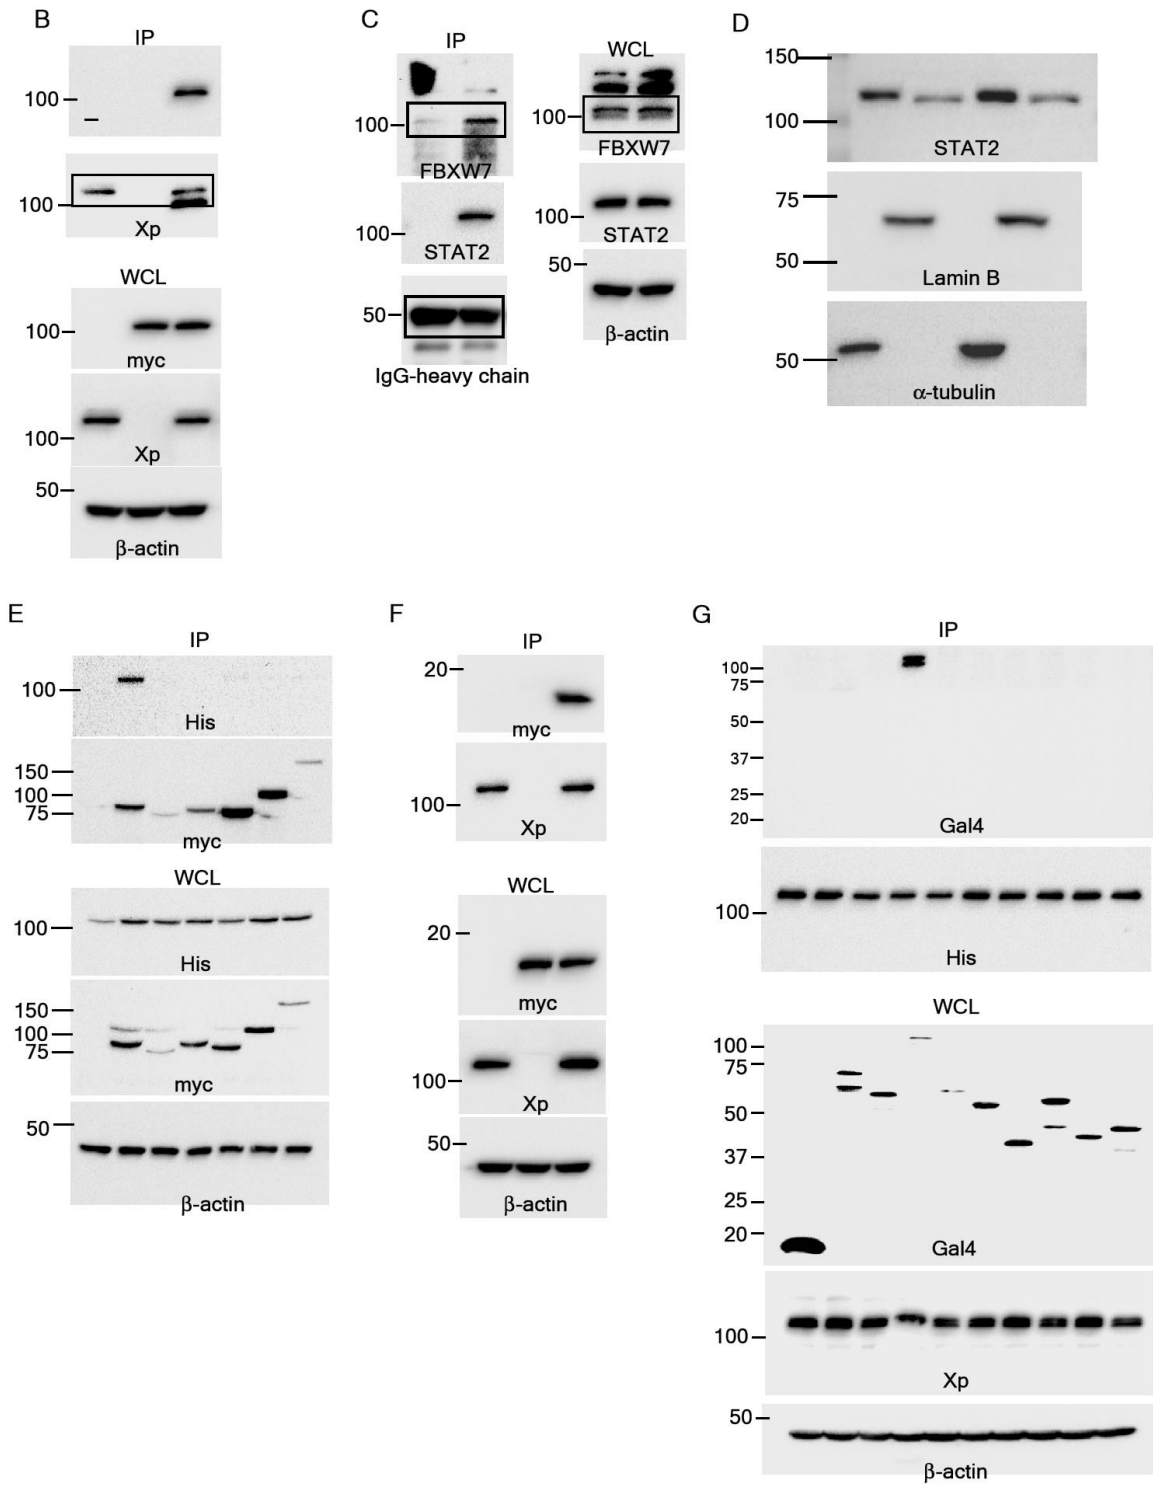

Fig.2

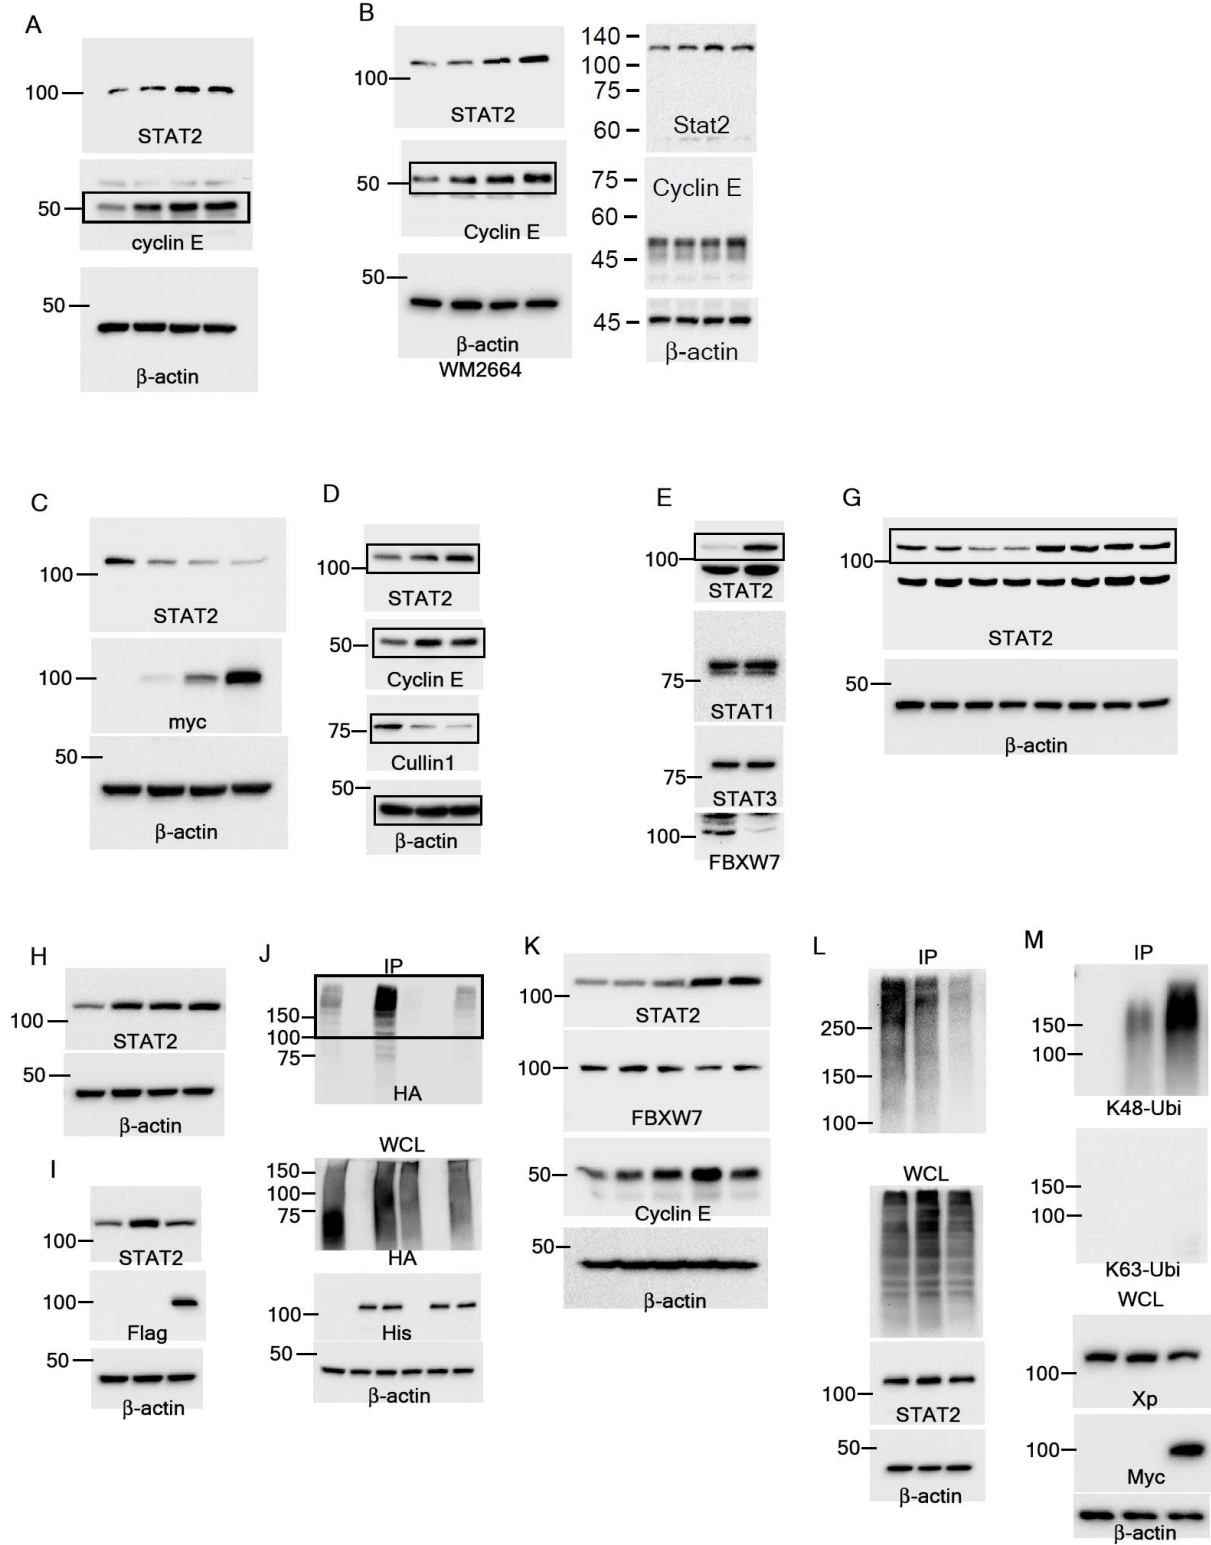

Fig.3

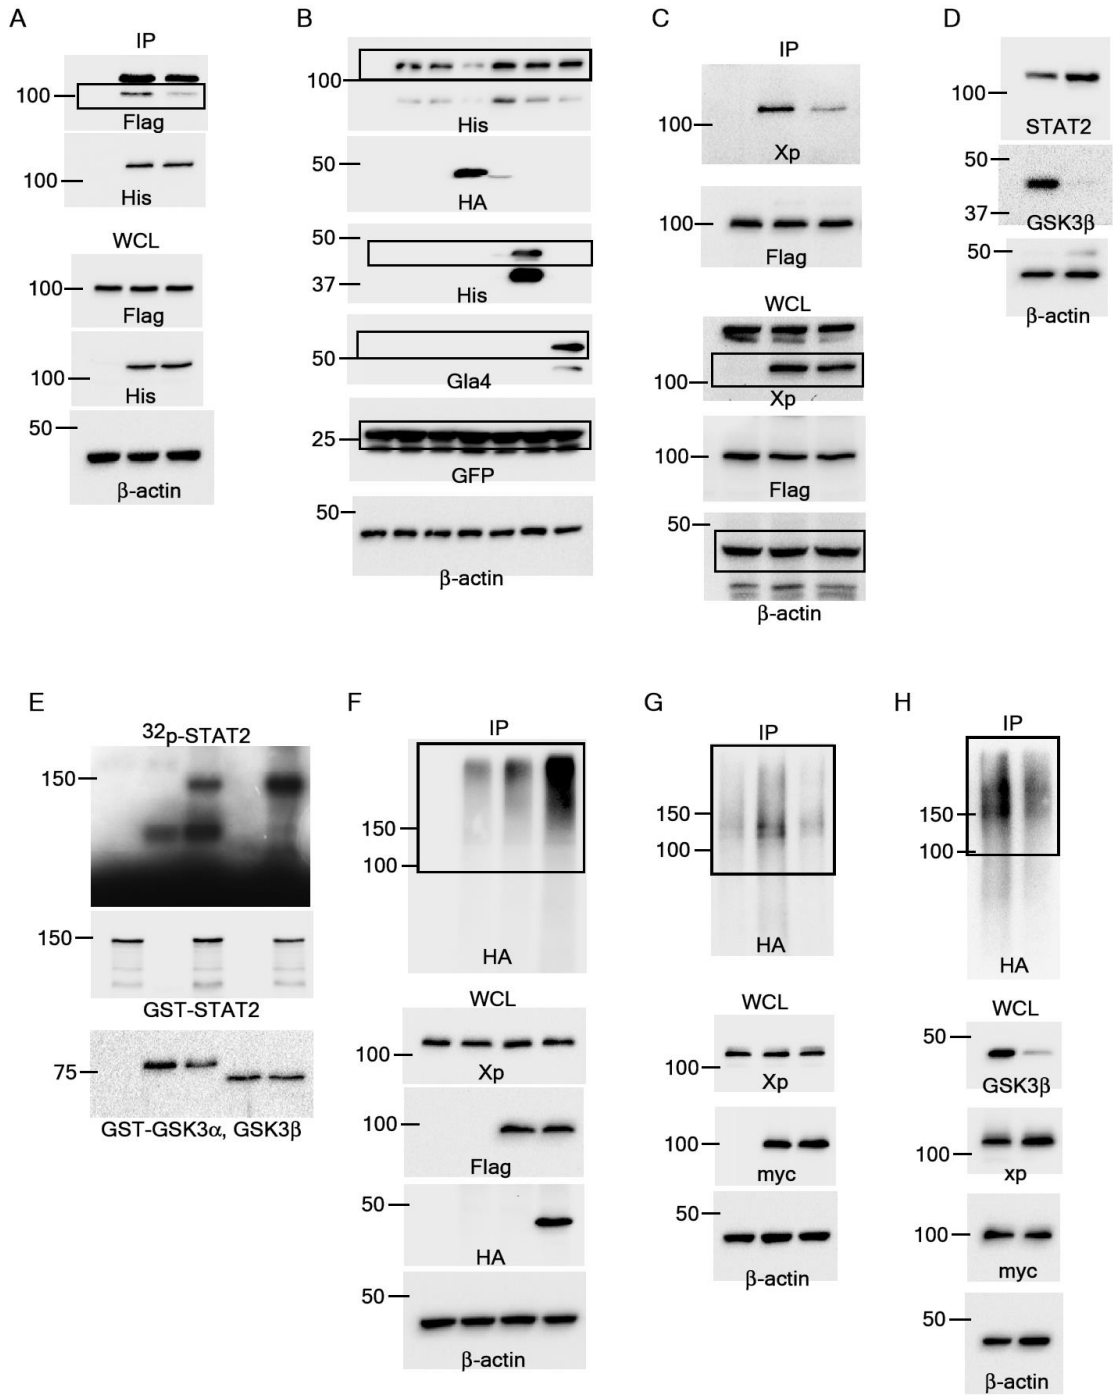

Fig.4

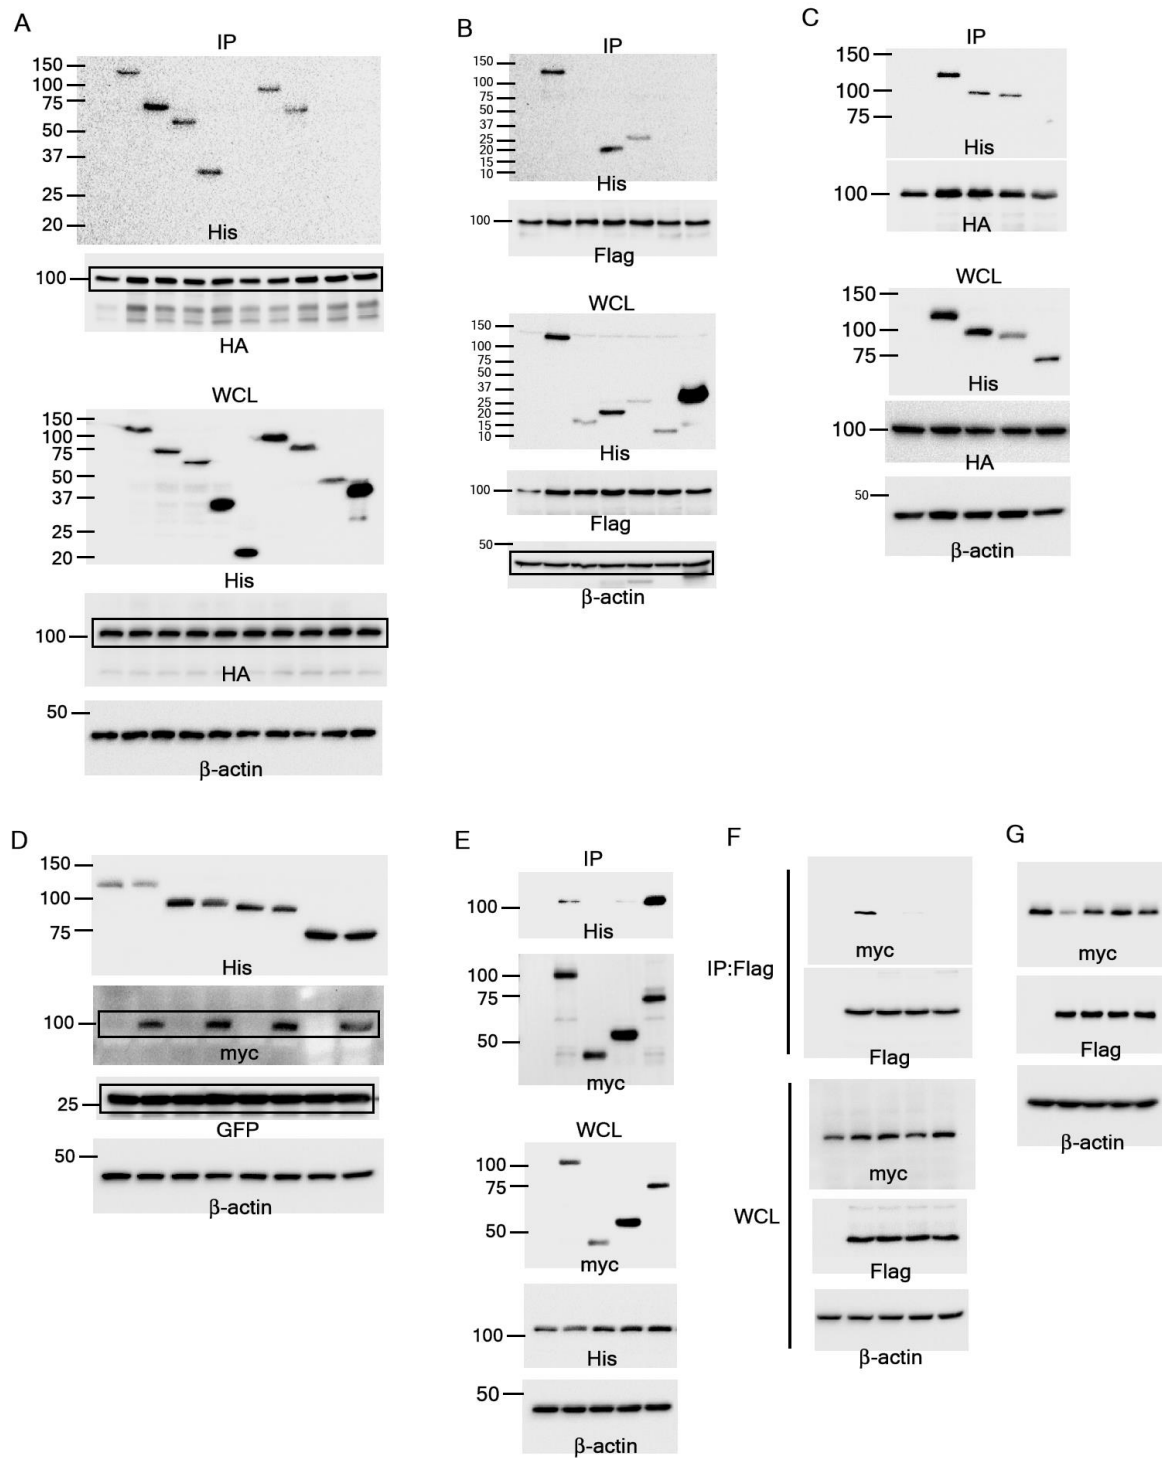



Fig.5

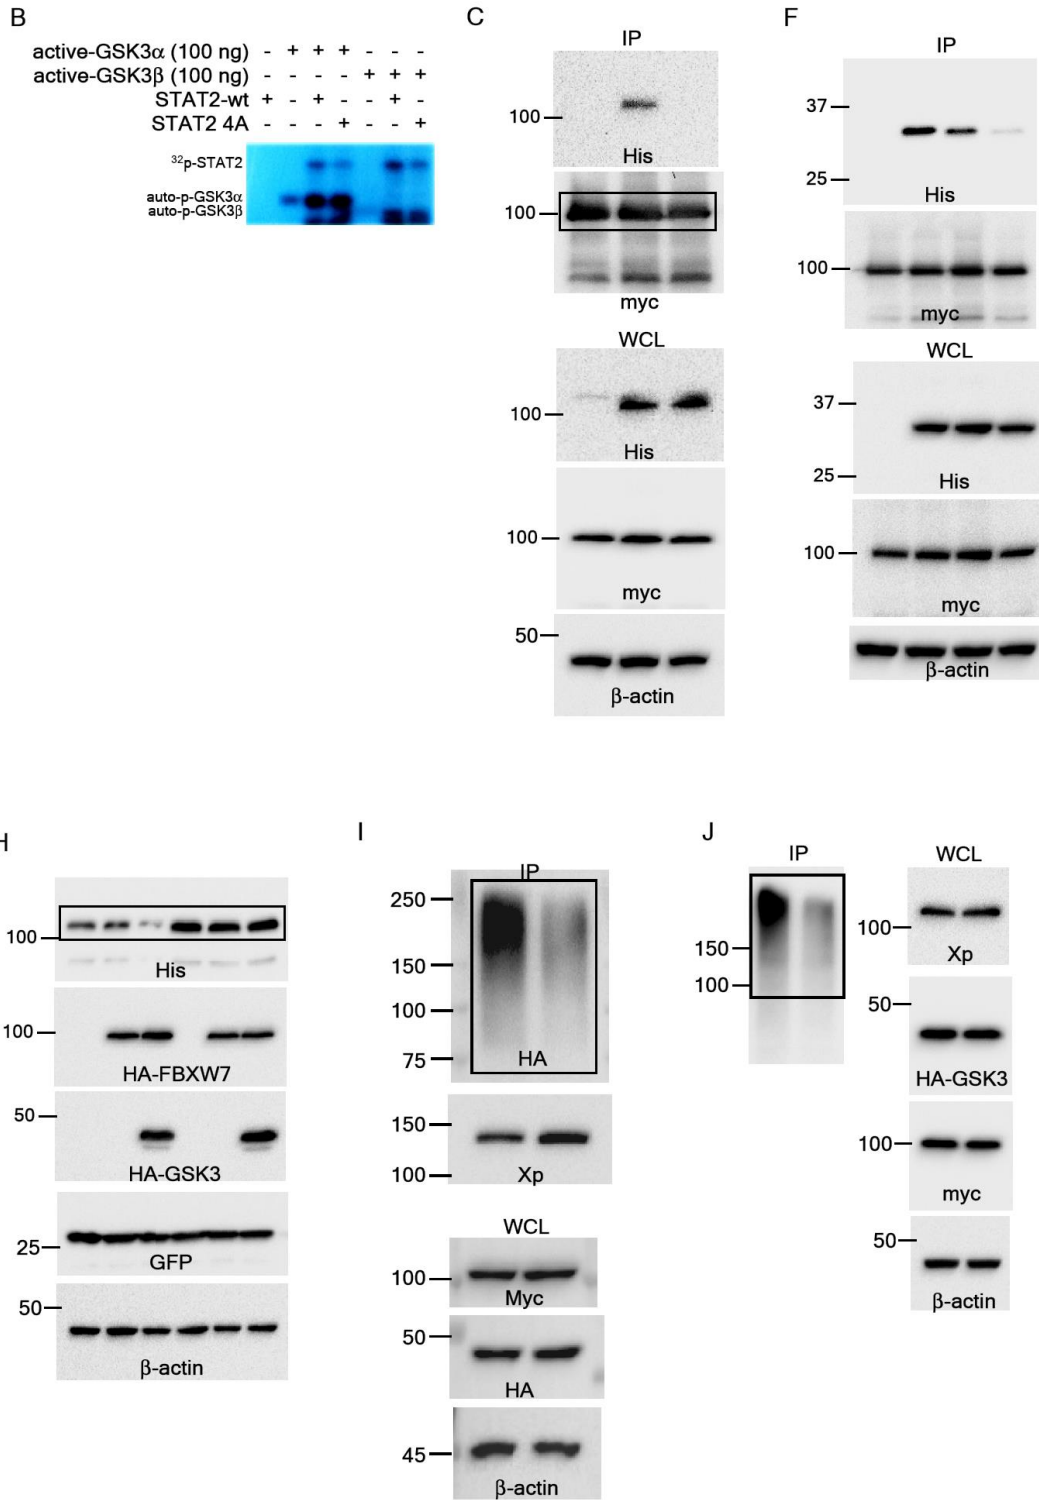

Fig.6

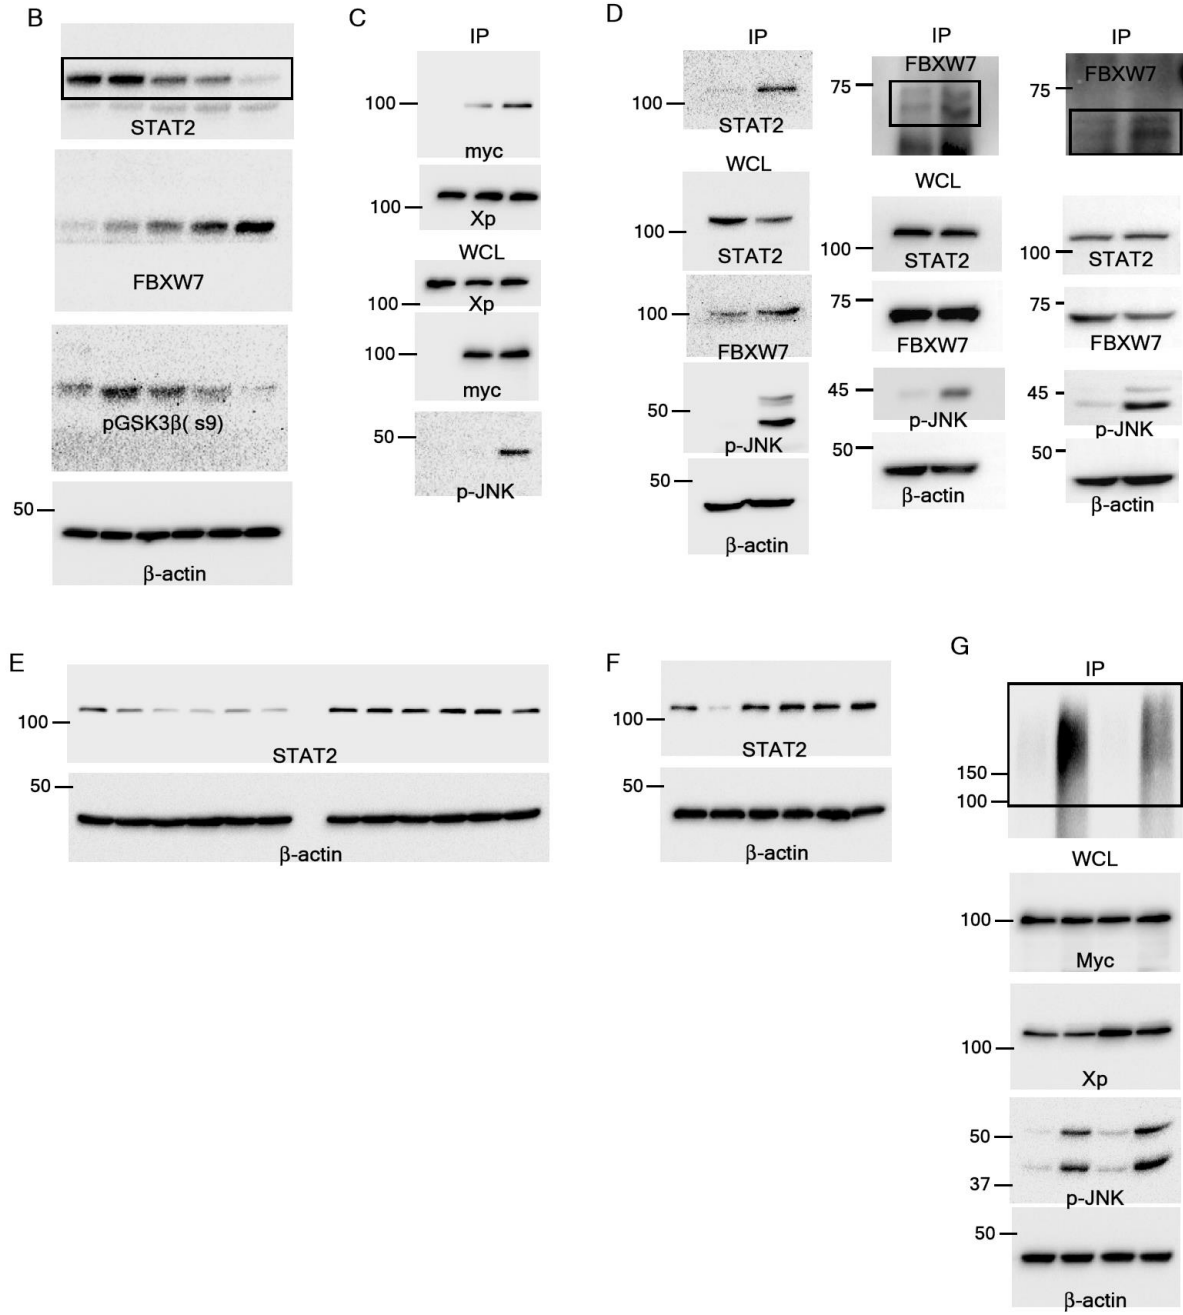

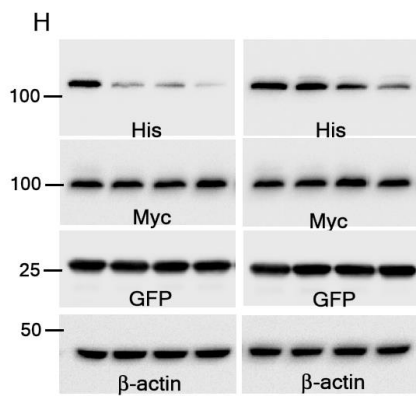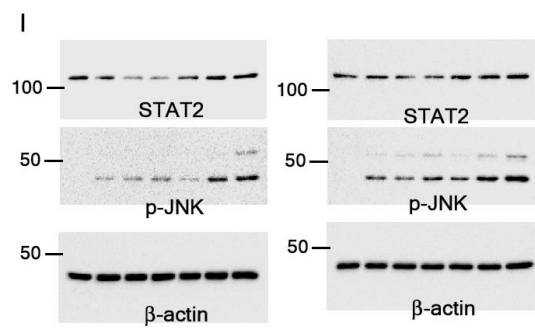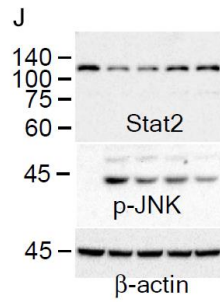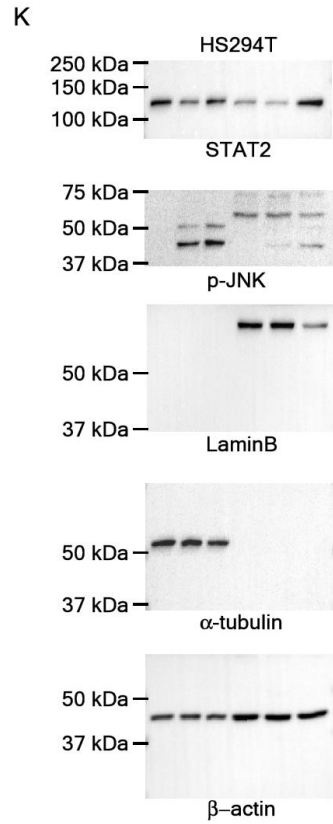

Fig.7

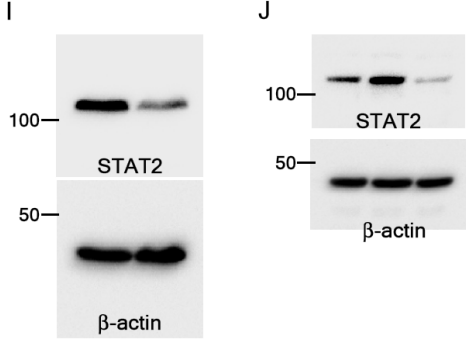

SI Dataset S9

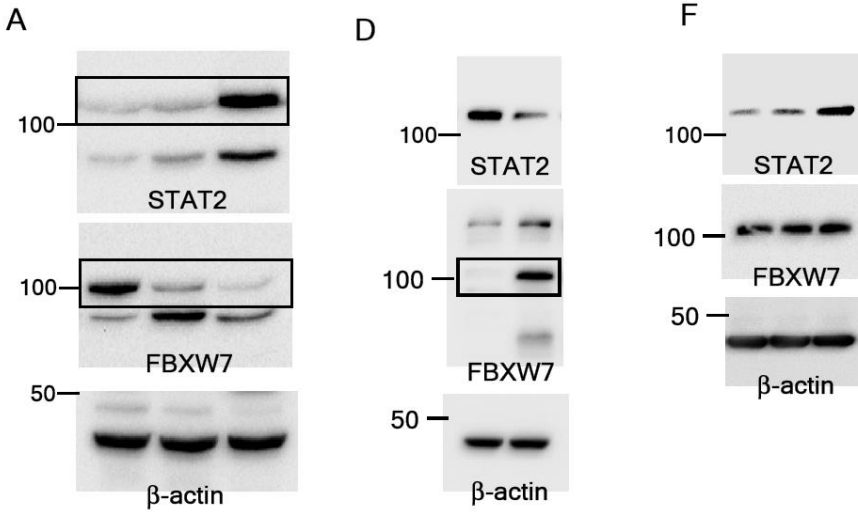

Supplement: pnas.1909879116.sapp.pdf [file pnas.1909879116.sapp.pdf]
